1 **Plant-microbe co-evolution: allicin resistance in a**  
2 ***Pseudomonas fluorescens* strain (PfAR-1) isolated from**  
3 **garlic**

4  
5 **Jan Borlinghaus, Anthony Bolger, Christina Schier, Alexander Vogel,**  
6 **Martin C. H. Gruhlke, Alan J. Slusarenko**

7  
8 **The antibiotic defense substance allicin (diallylthiosulfinate) is produced by garlic (*Allium***  
9 ***sativum* L.) after tissue damage, giving garlic its characteristic odor. Allicin is a redox-**  
10 **toxin that oxidizes thiols in glutathione and cellular proteins. A highly allicin-resistant**  
11 ***Pseudomonas fluorescens* strain (PfAR-1) was isolated from garlic, and genomic clones**  
12 **were shotgun electroporated into an allicin-susceptible *P. syringae* strain (Ps4612).**  
13 **Recipients showing allicin-resistance had all inherited a group of genes from one of three**  
14 **similar genomic islands (GI), that had been identified in an *in silico* analysis of the PfAR-1**  
15 **genome. A core fragment of 8-10 congruent genes with redox-related functions, present**  
16 **in each GI, was shown to confer allicin-specific resistance to *P. syringae*, and even to an**  
17 **unrelated *E. coli* strain. Transposon mutagenesis and overexpression analyses revealed**  
18 **the contribution of individual candidate genes to allicin-resistance. Moreover, PfAR-1 was**  
19 **unusual in having 3 *glutathione reductase* (*glr*) genes, two copies in two of the GIs, but**  
20 **outside of the core group, and one copy in the PfAR-1 genome. *Glr* activity was**  
21 **approximately 2-fold higher in PfAR-1 than in related susceptible Pf0-1, with only a single**  
22 ***glr* gene. Moreover, an *E. coli*  $\Delta$ *glr* mutant showed increased susceptibility to allicin, which**  
23 **was complemented by PfAR-1 *glr1*. Taken together, our data support a multi-component**  
24 **resistance mechanism against allicin, achieved through horizontal gene transfer during**  
25 **coevolution, and allowing exploitation of the garlic ecological niche. GI regions syntenic**  
26 **with PfAR-1 GIs are present in other plant-associated bacterial species, perhaps**  
27 **suggesting a wider role in adaptation to plants *per se*.**

28

29 *Pseudomonas* | antibiotic resistance | horizontal gene transfer | genomic island | ecological  
30 niche | microbiota

31

32

33 Adaptation is the process that tailors organisms to a particular environment and enhances their  
34 evolutionary fitness. Plants provide habitats for pathogenic and commensal organisms and  
35 generally it is assumed that microorganisms found in association with a given plant host are  
36 adapted to that ecological niche as part of the microbiota. Plants produce a vast array of  
37 secondary metabolites, many of which are involved in defense against microbes, resulting in a  
38 dynamic co-evolutionary arms race in the interaction between plants and their associated  
39 microorganisms (Burdon & Thrall, 2009). The organosulfur compounds produced by garlic  
40 (*Allium sativum* L.) provide an important example of this scenario. The potent antibacterial  
41 activity of garlic was shown in 1944 to be due to mainly to diallylthiosulfinate, which was given  
42 the trivial name allicin (Cavallito and Bailey, 1944 a; Cavallito et al., 1944 b). Allicin is formed  
43 by the action of alliin-lyase (E.C.4.4.1.4) on alliin (*S*-allyl-L-cysteine sulfoxide) when enzyme  
44 and substrate mix after damage to garlic tissues. Allicin is volatile and is responsible for the  
45 typical odor of freshly crushed garlic. Alliin-lyase is one of the most prevalent soluble proteins  
46 accumulating in garlic bulbs and leaves, indicating a major investment of plant resources into  
47 this defense system (Van Damme et al., 1992; Smeets et al., 1997, Borlinghaus et al., 2014).  
48 The reaction proceeds rapidly and alliin conversion to allicin is approximately 97 % complete  
49 after 30 sec. at 23 °C (Lawson & Hughes, 1992). The evolutionary investment of garlic in this  
50 mechanism is further emphasized by the fact that a single clove of approximately 10 g fresh  
51 weight can liberate up to 5 mg of allicin (Lawson et al., 1991; Block, 2010).

52 Allicin is an electrophilic oxidant that oxidizes thiols, or more precisely the thiolate ion,  
53 in a modified thiol-disulfide exchange reaction (Scheme 1), producing *S*-allylmercapto  
54 disulfides (Rabinkov et al., 2000; Müller et al., 2016). Cellular targets are accessible cysteines  
55 in proteins, and the cellular redox buffer glutathione (GSH). In this way, allicin can inhibit  
56 essential enzymes (Wills, 1956) and shift cell redox balance (Gruhlke et al., 2010). Allicin  
57 causes oxidative stress and was shown to directly activate the Yap1 transcription factor which  
58 coordinates the oxidative stress response in yeast (Gruhlke et al., 2017). Indeed, allicin has been  
59 described as a ‘redox toxin’ (Gruhlke et al., 2010).

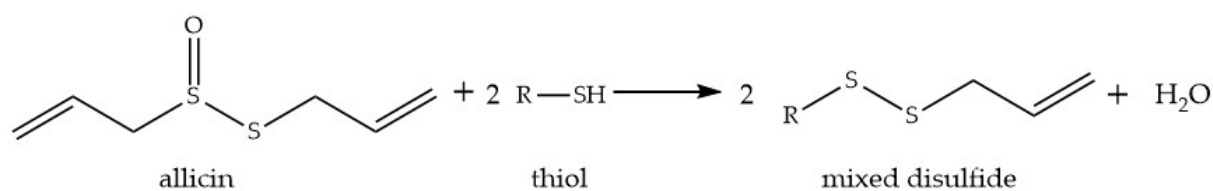

60

61 **Scheme 1. Reaction of allicin with a cellular thiol to produce an *S*-allylmercapto**  
62 **mixed disulfide.**

63 Thus, allicin has multiple sites and mechanisms of action in cells and is a concentration-  
64 dependent biocide active against bacteria, fungi oomycetes and mammalian cells (Borlinghaus  
65 et al., 2014). Because of allicin’s thiol reactivity, the cellular redox buffer glutathione (GSH)  
66 plays a central role in the resistance of cells at sublethal allicin concentrations (Gruhlke et al.,  
67 2010, 2017; Leontiev et al., 2018).

68 Because of its broad range of cellular targets, it is not easy for an organism to mutate  
69 simply to be more resistant to allicin. However, sensitivity to allicin does vary between different  
70 bacterial species and isolates (Reiter et al., 2017) and, as described here, we isolated a highly

71 alliin-resistant *Pseudomonas fluorescens* from a clove of garlic. How resistance against alliin  
72 might have evolved in *PfAR-1* is an intriguing question. One possibility is horizontal gene  
73 transfer (HGT), i.e. the sharing of genetic material between organisms that are not in a parent–  
74 offspring relationship (Soucy et al. 2015). Genomic islands arising by HGT generally show a  
75 different average GC content and codon usage to the rest of the genome. HGT is a widely  
76 recognized mechanism for adaptation in bacteria and microbial antibiotic resistance and  
77 pathogenicity are often associated with HGT (Maclean & San Milan 2019). Especially large,  
78 chromosomally-integrated regions obtained by HGT, that are referred to as genomic islands  
79 (GIs), are known to expand the ecological niches of their host bacteria for complex and  
80 competitive environments (Soucy et al. 2015).

81 In the work reported here, we isolated a highly alliin-resistant bacterium from its  
82 ecological niche on garlic, an environment hostile to non-adapted microorganisms, and we used  
83 a shotgun genomic cloning strategy to functionally identify genes conferring alliin resistance.  
84 The annotated gene functions of resistance-conferring genes throws light on the complex  
85 molecular mechanisms of resistance of *P. fluorescens* strain *PfAR-1* to the defense substance  
86 alliin, which has multiple targets and modes of action within the cell. This functional approach  
87 was complemented by whole-genome sequencing which revealed unique genomic features in  
88 comparison to other *Pseudomonads*. Both approaches independently identified the same sets of  
89 genes, validating the strategy. The complex genomic structures associated with conferring  
90 alliin resistance, arose via horizontal transfer and duplication, revealing the evolutionary  
91 investment associated with *PfAR-1* being able to exploit garlic as an environmental niche.

92

## 93 **Material & Methods**

94 Additional information about bacterial strains, plasmids, primers, chemical allicin synthesis,  
95 and allicin analysis are given in the supplementary material (SM).

96 ***PfAR-1* genomic library construction.** Genomic DNA of *PfAR-1* was extracted and partially  
97 digested with *Sau3AI* to obtain approx. 10 kbp fragments which were subcloned in *Bam*HI  
98 digested pRU1097 (SM7, SM8).

99 **Transposon mutagenesis.** Genomic clone 1 plasmid was transposon mutagenized in *Ps4612*  
100 using the transposon IS- $\Omega$ -km/hah on plasmid pSCR001. Plasmid DNA was transferred from  
101 *Ps4612* to *E. coli* MegaX to separate chromosomal and plasmid Tn integrations as described in  
102 SM9.

103 **Overexpression of putative allicin resistance genes.** Genes were amplified from genomic  
104 clone 1 plasmid DNA with overhangs for *NotI/XbaI* subcloning in pJABO (SM10).

105 **Complementation of *E. coli*  $\Delta$ *glr*.** *PfAR-1 glr1* was cloned in vector pJABO5 via homologous  
106 recombination in yeast (SM11).

107 **Inhibition zone assays.** Bacteria were freshly grown from an optical density at 600 nm ( $OD_{600}$ )  
108 of 0.05 to  $OD_{600} = 0.2-0.3$ . 300  $\mu$ l liquid culture were seeded in 20 ml 50 °C warm agar medium  
109 in round Petri dishes ( $\varnothing = 9$  cm). Holes ( $\varnothing = 0.6$  cm) were punched out to apply the test solution.  
110 Plates were then incubated over night.

111 To investigate the effects of different oxidants, bacterial cultures were freshly inoculated from  
112 over-night cultures and grown from an  $OD_{600}$  of 0.05 to an  $OD_{600}$  of 1.0 to 2.0.  $OD_{600}$  of all  
113 strains was adjusted to an  $OD_{600}$  of 1.0 and 125  $\mu$ l were applied on top of 20 ml solid medium  
114 in round Petri dishes ( $\varnothing = 9$  cm). Bacteria were spread with glass beads ( $\varnothing = 3$  mm) by soft  
115 shaking to avoid heat stress compared to seeded agar. Holes ( $\varnothing = 0.6$  cm) were punched out to  
116 apply the test solution.

117 **Streak tests.** A bacterial colony was harvested from agar plates in liquid medium, mixed, and  
118 streaked on 20 ml prepared solid media with holes in the center ( $\varnothing = 0.6$  cm) to apply test  
119 solutions.

120 **Drop tests.** Liquid bacterial cultures grew over night and were subsequently diluted ten-fold  
121 from  $OD_{600} = 1.0$  to  $OD_{600} = 10^{-5}$ . 5  $\mu$ l of each bacterial dilution was dropped on solid media  
122 (LB) containing different amounts of allicin. Plates were incubated at 37 °C over night.

123 **Protein extraction and glutathione reductase activity assay.** Pseudomonads were grown  
124 over night in liquid M9JB medium (SM2) to decrease slime production. Crude bacterial cell  
125 lysate was prepared from bacteria by vortexing with glass beads. Glutathione reductase activity  
126 assay was performed as described in SM 12.

127 **Genome sequencing of *PfAR-1*.** *PfAR-1* was grown in KB medium at 200 rpm and 28 °C over  
128 night. For DNA extraction, 15 ml of overnight culture was washed three times in 1xTE with 50  
129 mM EDTA by repeated pelleting at 5000 xg and resuspension by vortexing. The subsequent  
130 cell lysis was performed as described in Sambrook & Russel (2001) for gram-negative bacteria.  
131 From this material, three Illumina paired-end libraries were created, and run multiplexed in  
132 conjunction with other samples, twice as 2x100 paired-end runs on a HiSeq 2000, and once as  
133 a 2x311bp paired-end run on a MiSeq. The resulting data was filtered by Trimmomatic V0.32

134 (Bolger et al., 2014) and assembled using SPAdes V3.5.0 (Bankevich et al., 2012). The  
135 resulting assembly was largely complete, with a total size of 6.3 Mbp, but it was still relatively  
136 fragmented with 40 scaffolds of 1 kbp or larger, and an N50 of 370 kbp.

137 In order to fully resolve the genome into one contig, two additional long read datasets  
138 were generated on the Pacific Biosciences RS-II platform. For DNA extraction, 15 ml of  
139 overnight culture were washed three times in 1xTE with 50 mM EDTA by repeated pelleting  
140 at 5000 xg and resuspension by vortexing. The subsequent cell lysis was performed as described  
141 in Sambrook and Russel (2001) for Gram-negative bacteria. Further depletion of contaminating  
142 polysaccharides was achieved by application of the Pacific Biosciences protocol (Pacific  
143 Biosciences, 2019) for gDNA cleanup. The final DNA was eluted in RNase free water and  
144 quality was determined using Nanodrop for purity and Qubit for quantification. Sequencing  
145 was performed by GATC. The resulting two datasets, combined with the Illumina datasets  
146 described above, were then assembled, using SPAdes 3.5.0, yielding a single contig sequence  
147 of ~6.26Mbp.

148 Self-alignment of this contig revealed that 9,642 bp sequence was duplicated on each end  
149 which was then removed from one end. In order to simplify cross-genome comparisons, this  
150 sequence was aligned against the *Pf0*-1 reference sequence, and oriented to match, resulting in  
151 the 6,251,798 bp *PfAR*-1 assembly. The completed genome was then submitted to the RAST  
152 webserver (Aziz et al., 2008; Overbeek et al., 2014; Brettin et al., 2015) for automatic structural  
153 and functional annotation.

154 ***In-silico* analysis of the *PfAR*-1 Genome.** The low-GC regions identified in the *PfAR*-1  
155 genome were initially compared manually by cross-referencing the functional annotation of  
156 genes. This revealed a list of genes from each region which have a potentially common origin.  
157 After removing low confidence protein annotations, which were both unique to a single region  
158 and lacking a definitive functional annotation (*PfAR*1.peg.1058 and *PfAR*1.peg.1070), the  
159 remaining genes were manually reconciled into a putative ancestral arrangement of 26 genes.

160 **Comparison of Putative HGT Regions across the *Pseudomonas* Genus.** A set of bait genes  
161 was created based on the putative 26-gene ancestral arrangement described above. Since these  
162 26 groups were generally represented in more than one region, the set comprised 57 sequences  
163 in total. All available *Pseudomonas* sequences, comprising 215 complete genomes and 3,132  
164 draft genomes, were downloaded from the *Pseudomonas* Genome Database website  
165 (<https://www.pseudomonas.com/>), and queried for the bait sequences using BLAST. Similarity  
166 was calculated using a sliding window of 40 genes, and regions which exceeded a normalized  
167 bit-score total of 5 were selected.

168 **Inter-Species Codon Analysis.** Synonymous codon usage statistics were calculated for  
169 the full *PfAR*-1 genome, the 3 putative HGT regions, the 3347 other available *Pseudomonas*  
170 genomes, and 8 representative non-*Pseudomonas* Gammaproteobacteria (*Acinetobacter*  
171 *baumannii* AC29, *Alkanindiges illinoisensis*, *Azotobacter vinelandii* DJ, *Escherichia coli* K12  
172 MG1655, *Moraxella catarrhalis*, *Perlucidibaca piscinae*, *Rugamonas rubra*, *Ventosimonas*  
173 *gracilis*). After removing methionine and tryptophan, which have only one codon, the remaining  
174 codons were analysed using Principle Component Analysis (PCA).

175 **Phylogenetic Comparison of Whole Genome vs RE-like sequences.** Whole genome  
176 phylogenetic analysis was performed using OrthoFinder (Emms and Kelly, 2015; version 1.1.8,  
177 <https://github.com/davidemms/OrthoFinder/releases/tag/1.1.8>) to place the newly sequenced  
178 *PfAR-1* genome in its phylogenetic context, using a subset of 280 *Pseudomonas* genomes  
179 supplemented by 4 more distant genomes downloaded from NCBI GenBank, namely  
180 *Azotobacter vinelandii* DJ, *Acinetobacter baumannii* AC29, *Escherichia coli* K12 MG1655 and  
181 *Burkholderia cenocepacia* J2315 which served as an outgroup. The 280 *Pseudomonas* genome  
182 subset consisted of a) all 215 complete genomes, b) the draft genomes showing a substantial hit  
183 against the putative-HGT gene set, as described above, and c) 9 *Pseudomonas* genomes with  
184 unusual codon usage (*P. lutea*, *P. luteola*, *P. sp* HPB0071, *P. sp* FeS53a, *P. zeshuui*, *P. hussainii*  
185 JCM, *P. hussainii* MB3, *P. caeni* and *P. endophytica*).

186 In a second analysis, the 3 putative-HGT from *PfAR-1* were compared against the  
187 corresponding regions from other *Pseudomonas* genomes, identified as described above. For  
188 this analysis, the sequences from each genomic island region was re-ordered according to the  
189 best match against the 26 bait group sequences, concatenated to form a single pseudo-sequence  
190 and aligned using MAFFT (version 7, Katoh and Standley 2013). The resulting multiple  
191 alignment was accessed using “fitch” from Phylip (version 3.69) and the resulting trees were  
192 visualized using FigTree (version 1.4.3,  
193 <https://github.com/rambaut/figtree/releases/tag/v1.4.3>).

194 **IslandViewer Analysis.** For independent confirmation of the HGT analysis, the *PfAR-1*  
195 genome was submitted to the IslandViewer 4 (Bertelli et al., 2017) website, for assessment  
196 regarding horizontal gene transfer events.

197 **Additional annotation of genomic repeat regions.** Gaps in the annotation of genomic repeats  
198 with putative horizontal origin indicated incomplete annotation, also implicated by a low gene  
199 density (1 gene per 1.3 - 1.6 kbp), which is expected to be one gene per 1 kbp in bacterial  
200 genomes (Koonin and Wolf, 2008). Regions were submitted individually without the remaining  
201 genome sequence to the RAST webserver, thereby closing annotational gaps (1 gene per 0.90  
202 kbp in average). Remaining DNA regions without annotation were manually curated using  
203 NCBI open reading frame finder and BLASTp.

204 **Dot plot and %GC content analysis.** For dot plot analysis and %GC content analysis and  
205 comparison, Genome Pair Rapid Dotter (GEPARD, Krumsiek et al., 2007), Artemis  
206 Comparison Tool (ACT, Carver et al. 2005), and UGENE (Okonechnikov et al., 2012) were  
207 used, respectively.

208 **Congruent set of genes and copy number analysis.** Analysis was performed by batch  
209 translation of the coding sequences of the *PfAR-1* genomic repeats into peptide sequences using  
210 coderet from the emboss suite (Rice et al. 2000), and compared these against all other peptide  
211 sequences from the genomic repeats and the remaining genome, respectively. Peptides with a  
212 minimal peptide length of  $\geq 100$  amino acids were compared using BLASTp (Camacho et al.  
213 2009) combined with the graphical user interface visual blast (Melee 2016). Significantly  
214 similar sequences were defined by a minimal sequence similarity of  $\geq 25\%$  and with an E-  
215 value  $\leq 0.0001$ .

## 216 Results

217 **An allicin-resistant *Pseudomonas fluorescens* isolated from garlic.** We reasoned that  
218 if allicin-resistant bacteria were to be found in nature, then it would likely be in association with  
219 garlic cloves. Therefore, bacteria isolated from garlic bulbs were tested for allicin resistance in  
220 a Petri plate agar diffusion test with bacteria-seeded agar. An extremely resistant isolate was  
221 detected that was able to grow right up to the allicin solution in the agar, whereas allicin-  
222 sensitive *E coli* DH5 $\alpha$  and *Pseudomonas syringae* pv. *phaseolicola* Ps4612 isolates showed  
223 large inhibition zones (Fig. 1). The allicin-resistant isolate was putatively identified by Sanger  
224 sequencing of the ribosomal ITS (internal transcribed spacer) as a *Pseudomonas fluorescens*,  
225 and we therefore named it *PfAR-1* (*Pseudomonas fluorescens* Allicin Resistant-1).

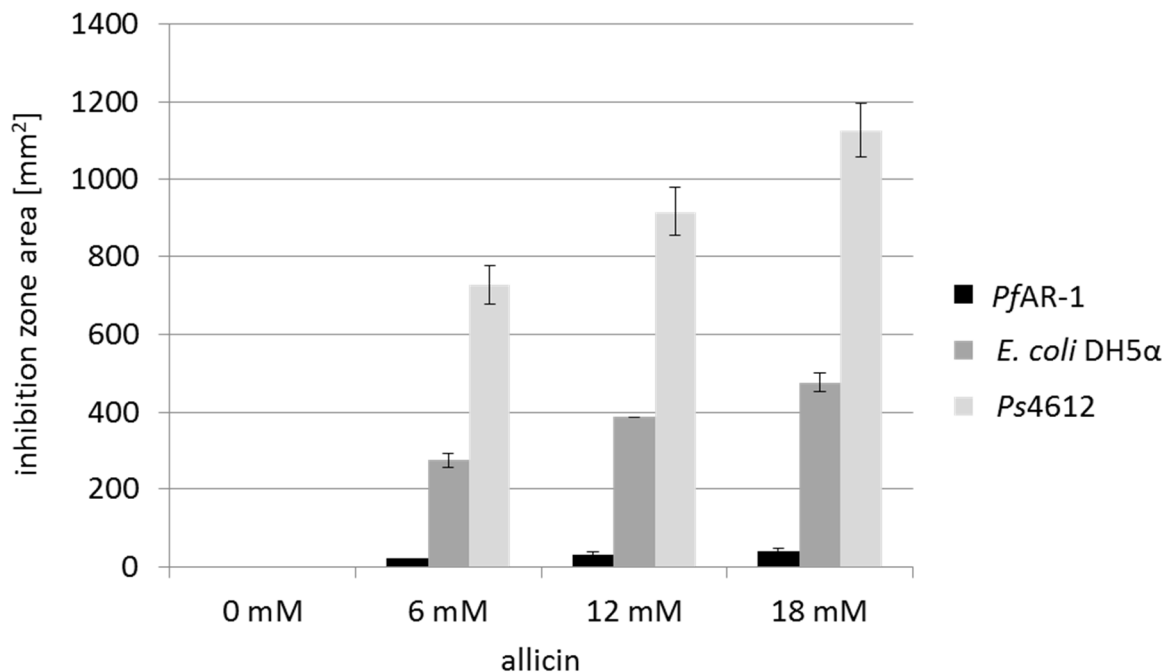

226

227 **Fig. 1.** Comparison of the sensitivity of *PfAR-1*, *E. coli* DH5 $\alpha$  and *P. syringae* Ps4612 against allicin. The  
228 area of the inhibition zones in an agar diffusion test is shown for 40  $\mu$ l of a range of allicin concentrations  
229 applied centrally to a well in the agar medium. n = 3

230

231 **Identification *PfAR-1* genomic clones conferring allicin-resistance.** *PfAR-1* genomic clones  
232 were shotgun electroporated into cells of highly-allicin-susceptible *Ps4612*. In all,  $1.92 \times 10^8$   
233 clones were screened giving approximately 33 x library coverage. Resistant recipients were  
234 selected on medium containing 75  $\mu$ M allicin. No allicin-resistant colonies grew on the control  
235 plate of *Ps4612* cells that had been electroporated with the empty vector. Eight allicin-resistant  
236 transformants were confirmed in streak tests (Fig. 2). The degree of allicin resistance conferred  
237 by genomic clone 8 was slightly less than that conferred by the clones 1-7, as evidenced by the  
238 slightly greater clear zone where growth was inhibited (Fig. 2). Restriction analysis of the  
239 genomic inserts revealed that the eight resistance-conferring clones were all approximately 10  
240 kb in size.

241

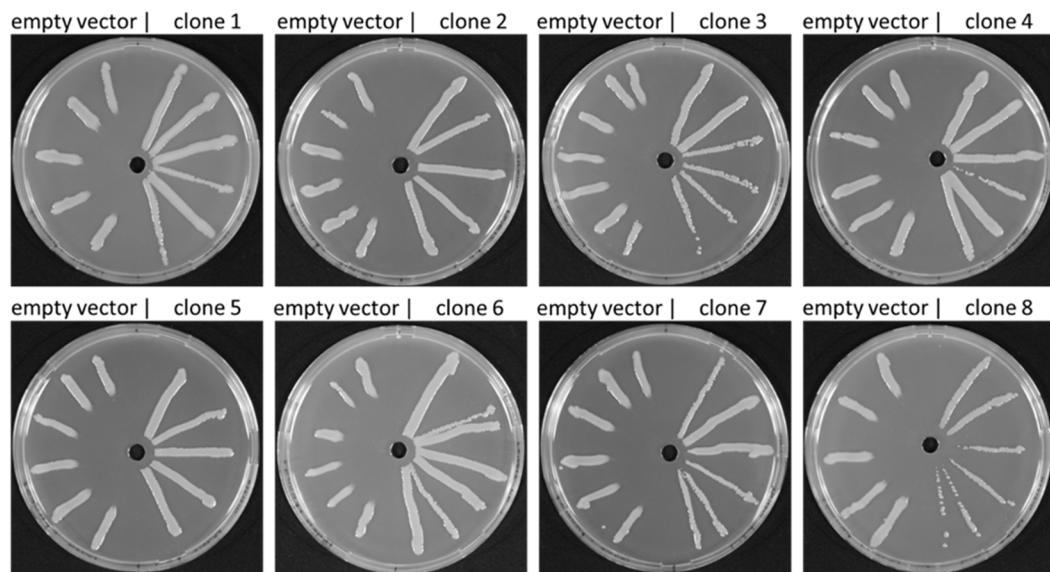

242

243 **Fig. 2.** Allicin resistance conferred by genomic clones from *PfAR-1* electroporated into *Ps4612*. On the left  
244 half of each Petri plate are *Ps4612* cells transformed with empty vector and on the right half *Ps4612* cells  
245 transformed with vector containing a genomic insert. The central wells contained 30 µl of 32 mM allicin  
246 solution.

247

248 **Genomic sequencing of *PfAR-1*.** The *PfAR-1* genome was sequenced using a combined  
249 Illumina and Pacific Biosciences dataset, and assembled into a single chromosome, as described  
250 in the Materials and Methods. The resulting genome was 6,251,798 bp, and had an overall GC  
251 content of 59.7%. A total of 5,406 putative protein-coding sequences were detected, in addition  
252 to 73 tRNAs and 6 rRNA clusters. With an average nucleotide identity (ANI) of 85.94%  
253 (SM18), the closest relative to *PfAR-1* in the data bases was *Pseudomonas fluorescens*  
254 reference strain *Pf0-1*, confirming the prior ITS-based assessment.

255

256 **Characterization of resistance-conferring clones.** Sanger sequencing of the clone ends was  
257 used to identify the origin of the clones within the sequenced *PfAR-1* genome. This revealed  
258 that clones 1 and 8 had unique origins, whereas clones 2-7 were identical to each other. Thus,  
259 3 relatively compact resistance-conferring genomic regions had been identified. Genes carried  
260 on the clones had preponderantly redox-related functions (Fig. 3 A, Table 1). The overall  
261 arrangement of the genes was highly conserved among the clones. Clones 1-7 contained two  
262 sets of genes conserved in the direction of transcription: *osmC*, *sdr*, *tetR*, *dsbA*, and *trx* and the  
263 second set being *ahpD*, *oye*, *4-ot*, *kefF*, and *kefC* (Fig. 3 C). Clone 8, which conferred slightly  
264 less allicin resistance than the other clones (Fig. 2), lacked the *ahpD* and *oye* genes. The *kefF*  
265 and *kefC* genes are part of a glutathione-regulated K<sup>+</sup> efflux/H<sup>+</sup> influx system and are classified  
266 as transporters, although they too are regulated by cellular glutathione, and thus are also redox-  
267 dependent.

268



269 Table 1: Congruent set of genes identified in the genomic clones 1-7 that conferred allicin resistance to *E. coli* K12 DH10B  
 270 and *P. syringae* pv. *phaseolicola* 4612.

| <b><i>PfAR-1</i> genes<sup>1</sup></b>                                | <b>Reported function in other bacteria</b>                                                                                                                                                                                                                                                                         | <b>References</b>                                                                                                                 |
|-----------------------------------------------------------------------|--------------------------------------------------------------------------------------------------------------------------------------------------------------------------------------------------------------------------------------------------------------------------------------------------------------------|-----------------------------------------------------------------------------------------------------------------------------------|
| <i>alkylhydroperoxidase (ahpD)</i>                                    | Part of the carboxymuconolate decarboxylase (CMD) family. NADH-dependent AhpD/AhpC system confers oxidative stress resistance in <i>Mycobacterium tuberculosis</i> .                                                                                                                                               | Bryk et al., 2002; Koshkin et al., 2003                                                                                           |
| <i>old yellow enzyme (oye)</i>                                        | OYE protein family contains a diverse set of NADPH-dependent dehydrogenases that reduce $\alpha,\beta$ unsaturated aldehydes and ketones. OYE was reported to be part of the oxidative stress response in yeast and in <i>Bacillus</i> .                                                                           | Stott et al., 1993; Vaz et al., 1995; Trotter et al., 2006; Fitzpatrick et al., 2003                                              |
| <i>4-oxalocrotonate tautomerase (4-ot)</i>                            | 4-OT converts 2-hydroxymuconate to the $\alpha,\beta$ -unsaturated ketone 2-oxo-3-hexendioate.                                                                                                                                                                                                                     | Whitman et al., 1991; Whitman 2002                                                                                                |
| <i>glutathione-regulated potassium-efflux system protein F (kefF)</i> | KefF is a cytoplasmic regulator of KefC. KefF is activated by glutathione-adducts and subsequently activates KefC.                                                                                                                                                                                                 | Munro et al., 1991; Miller et al., 2000; Meury and Kepes, 1982; Elmore et al., 1990; Ferguson et al., 1997; Lyngberg et al., 2011 |
| <i>glutathione-regulated potassium-efflux system protein C (kefC)</i> | KefC is a proton import/potassium export antiporter. KefC activity is tightly regulated by glutathione and KefF. Active KefC confers resistance against electrophiles like <i>N</i> -ethylmaleimide in <i>E. coli</i> .                                                                                            |                                                                                                                                   |
| <i>Thioredoxin (trx)</i>                                              | Trx are dithiol-disulfide oxidoreductases that help maintain the thiol groups of proteins in a reduced state                                                                                                                                                                                                       | Holmgren, 2000                                                                                                                    |
| <i>disulfide bond protein A (dsbA) / frnE-like</i>                    | DsbA in <i>E. coli</i> is responsible for introduction of disulfide bonds in nascent polypeptide chains in the periplasmic space. Other Dsb members show chaperone-like functions. FrnE is a member of the DsbA family and was reported to confer oxidative stress resistance in <i>Deionococcus radiodurans</i> . | Bardwell et al., 1991; Kamitani et al., 1992; Khairnar et al., 2013                                                               |
| <i>transcriptional regulator tetR</i>                                 | Transcriptional repressors widely distributed among different bacteria.                                                                                                                                                                                                                                            | Ramos et al., 2005                                                                                                                |
| <i>short chain dehydrogenase (sdr)</i>                                | The family contains dehydratases, decarboxylases or simple oxidoreductases.                                                                                                                                                                                                                                        | Kavanagh et al., 2008                                                                                                             |
| <i>osmotically inducible protein C (osmC)</i>                         | The family contains peroxiredoxins which play a role in oxidative stress defense. OsmC confers resistance to organic hydroperoxides such as cumene hydroperoxide in <i>E. coli</i> .                                                                                                                               | Lesniak et al., 2003                                                                                                              |

271 <sup>1</sup>annotation is based on protein domains and corresponding protein families

272

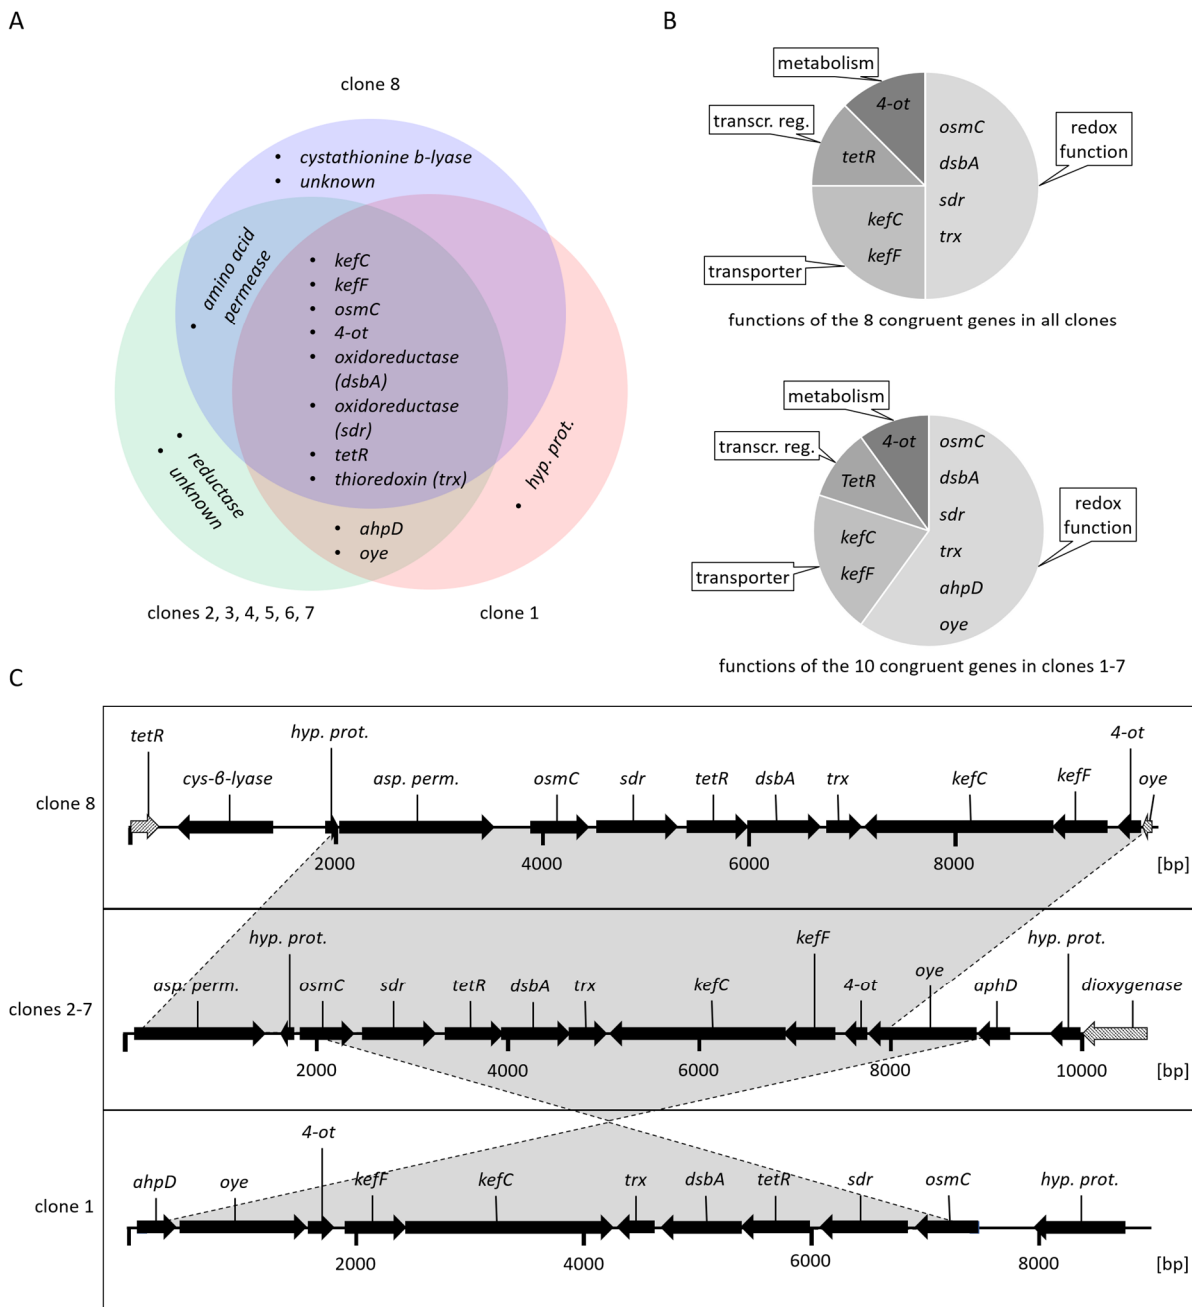

273

274 **Fig. 3.** Characteristics of the allicin-resistance-conferring *PfAR1* genomic clones. (A) Venn diagram  
 275 showing congruent genes. (B): Congruent genes grouped by function. (C) Arrows show the direction of  
 276 transcription. Grey shaded arrows in clones 8 and 2-7 represent truncated genes. (unkn.: unknown i.e. no  
 277 similar protein or protein domains in databases; transcr. reg: transcriptional regulator; hyp. prot.:  
 278 hypothetical protein).

279

280 ***PfAR-1* genomic clones conferred allicin-specific-resistance to *E. coli* and *P. savastanoi***  
 281 **1448.** Clones 1, 5 and 8 were chosen so that each group was represented for the initial functional  
 282 tests. The genomic clones were electroporated into the allicin-susceptible *E. coli* K12 DH10B  
 283 and *Pseudomonas savastanoi* (formerly *P. syringae* pv. *phaseolicola*) 1448A strains. *Ps1448A*  
 284 was chosen for further experiments because, in contrast to *Ps4612*, its genome has been  
 285 sequenced. Various oxidants were tested (Fig. 4 A), and it was found that the genomic clones

286 conferred allicin-specific resistance in both *E. coli* and *Ps1448A*, as evidenced by a reduction  
 287 in inhibition zone area against allicin, but not the other oxidants tested (Fig. 4 B). The degree  
 288 of allicin-resistance conferred by genomic clones 1 and 5 was similar, but as previously  
 289 observed in the streak test with *Ps4612* (Fig. 2), clone 8 was less effective than the other clones  
 290 (Fig. 4 B).

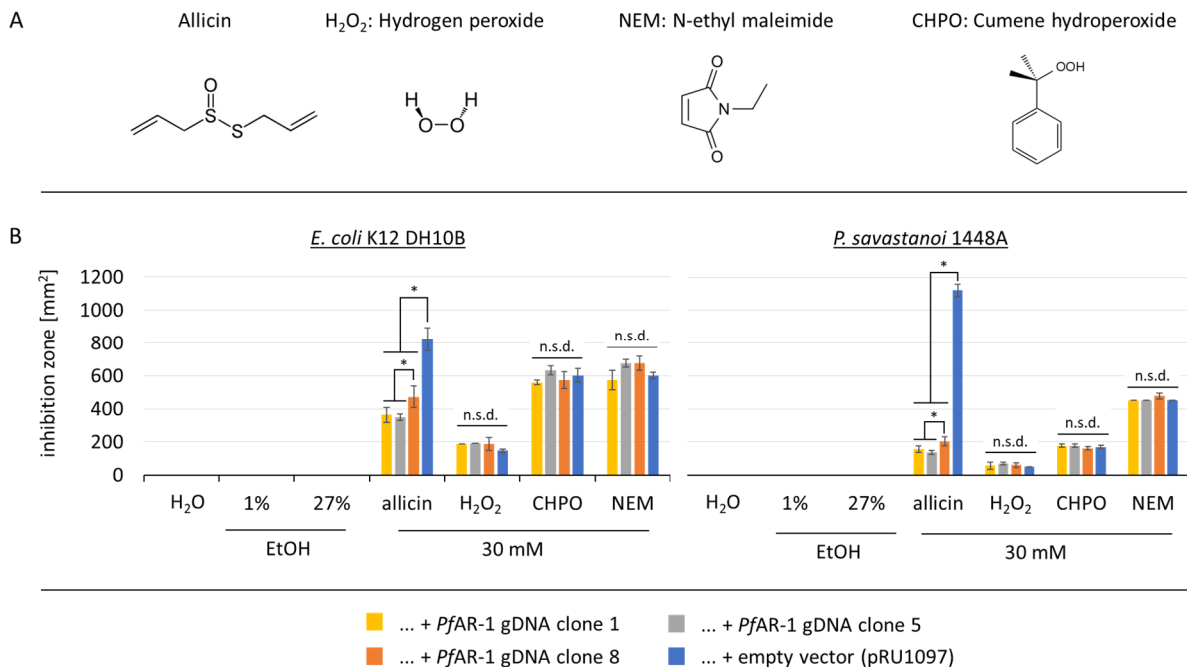

291

292 **Fig. 4.** *PfAR-1* genomic clones conferred resistance against allicin, but not other oxidants. 40  $\mu$ l of 30 mM  
 293 allicin, H<sub>2</sub>O<sub>2</sub>, *N*-ethylmaleimide (NEM) or cumene hydroperoxide (CHPO), were applied to wells cut in  
 294 bacteria-seeded agar. Ethanol was used as a solvent for NEM and CHPO and 1% and 27% ethanol,  
 295 respectively, were included as controls. (A) Chemical formulas of the oxidants tested. (B) Areas of the  
 296 inhibition zones (mm<sup>2</sup>) are shown for the recipients containing genomic clones 1, 5, 8 or the empty vector.  
 297 (n = 3 or more, \* = p < 0.05, Holm-Sidak method for all pairwise comparison), n.s.d. = no significant  
 298 difference.

299 **Contribution of individual genes to allicin resistance.** The contribution of individual genes  
 300 to allicin resistance was investigated by transposon mutagenesis of clone 1 in *E. coli* and  
 301 screening Tn-mutants for loss-of-function. In addition, subcloning and over-expression of  
 302 individual genes in *Ps4612* was undertaken, with screening to assess for gain-of-function.

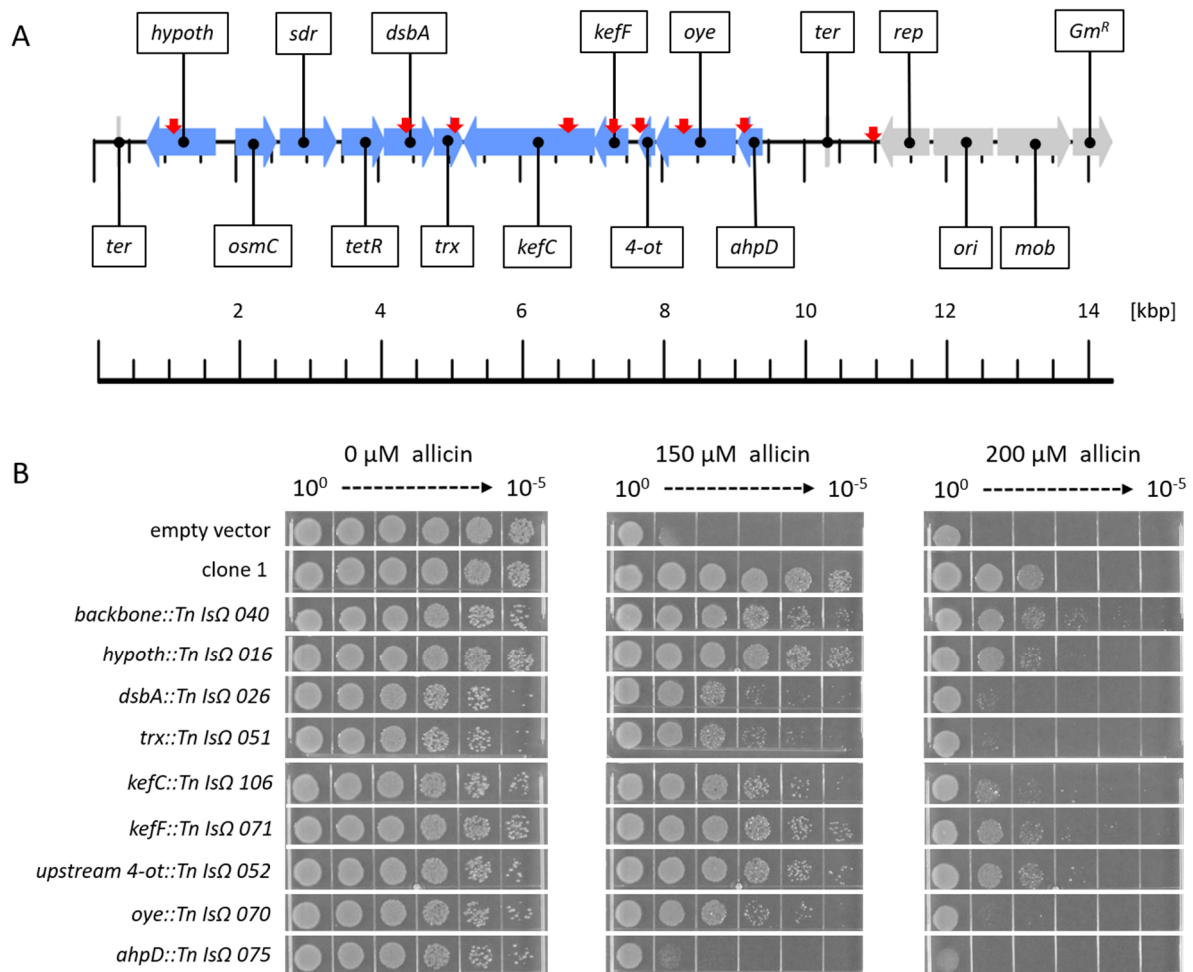

303

304 **Fig. 5.** Transposon mutagenesis of genes on clone 1. (A) Linear genetic map of *PfAR-1* genomic clone 1.  
 305 *PfAR-1* genes are shown in blue, whereas genes on the vector backbone are shown in grey. The position of  
 306 transposon insertions is indicated by red arrows. (B) *E. coli* MegaX DH10B transformed with clone 1, or  
 307 empty vector, was compared with transposon-insertion mutants with transposon-insertion mutants in drop  
 308 tests. All cultures were diluted to OD<sub>600</sub> = 1 (= 10<sup>0</sup>) and 5 μL of a 10<sup>n</sup> dilution series down to 10<sup>-5</sup> was  
 309 dropped onto LB medium supplemented with different allacin concentrations.

310 In total, 86 out of the 132 Tn-mutants investigated showed a decrease in allacin resistance  
 311 compared to non-mutagenized genomic clone 1 in a streak assay. Tn-mutants were examined  
 312 by sequencing and the positions of Tn insertions are shown in Fig. 5 A. No Tn-insertions were  
 313 found in the *osmC*, *sdr* or *tetR* genes, but for the majority of the remaining genes, several  
 314 independent Tn insertion sites were found and these showed a tendency towards decrease in  
 315 resistance SM13). Tn-mutants for each gene were selected for testing in a more sensitive drop  
 316 test (Fig. 5 B). In the absence of allacin stress, all Tn-mutants grew less well than controls (wt  
 317 clone 1 and empty vector), as evidenced by the lower colony density visible at the 10<sup>-4</sup> and 10<sup>-5</sup>  
 318 dilutions, respectively. Tn insertions in the vector backbone, or the genes encoding the  
 319 hypothetical protein *kefF*, or the upstream region of *4-ot*, all had no visible effect on the allacin-  
 320 resistance phenotype compared to clone 1, at either 150 or 200 μM allacin. In contrast, Tn  
 321 insertions in either *dsbA*, *trx*, *kefC*, *oye*, or *ahpD*, led to a clear loss of allacin resistance at both  
 322 allacin concentrations. *ahpD*::Tn showed by far the highest loss of allacin resistance, and  
 323 resembled the empty vector control. *ahpD* potentially codes for an alkylhydroperoxidase, and  
 324 the data suggest that this protein plays a major role in being able to confer allacin resistance to

325 *PfAR-1*. The contributions of the *dsbA* and *trx* genes to allicin resistance were more than those  
326 of the *kefC* and *oye* genes, but all of these Tn-mutants showed a clear allicin phenotype,  
327 especially at the 200  $\mu$ M allicin level (Fig. 5 B).

328 **Overexpression of *ahpD* and *dsbA* conferred high allicin-resistance to *Ps4612*.** The set of  
329 congruent genes on clone 1 were cloned individually in an expression vector to investigate the  
330 contribution of each gene to allicin resistance. *Ps4612* was used for these experiments, because  
331 we reasoned that even a small gain in resistance should easily be visible in this highly susceptible  
332 allicin isolate. Of the congruent genes from clone 1, only *ahpD* and *dsbA* showed a gain of  
333 resistance when overexpressed individually. The resistance conferred by *ahpD* was almost as  
334 high as by the intact clone 1. Overexpression of *dsbA* in *Ps4612* also caused a clear gain of  
335 resistance (Fig. 6).

336

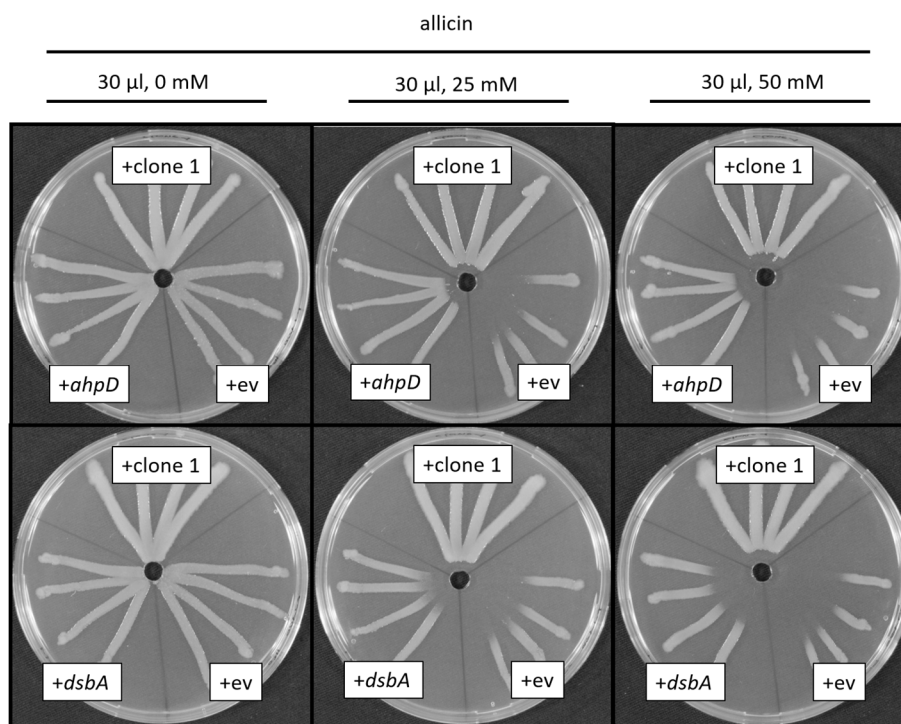

337

338 **Fig. 6 Overexpression of *AhpD* or *DsbA* conferred allicin resistance to *Ps4612*.** *ahpD* and *dsbA* were  
339 transformed in *Ps4612*. Transformants were streaked from the center to the edges of the plate. Test solutions  
340 (30  $\mu$ l, water, 25 or 50 mM allicin) were applied to each well and the plates were incubated for 48 h at 28  
341  $^{\circ}$ C.

342

343 ***In-silico* analysis of the *PfAR-1* Genome.** As stated above, *Pseudomonas fluorescens Pf0-1* is  
344 *PfAR-1*'s closest previously sequenced relative. Nonetheless, dot matrix alignment of the *Pf0-1*  
345 and *PfAR-1* genomes revealed substantial differences. The *PfAR-1* chromosome had a central  
346 inverted region with respect to *Pf0-1*, and 3 large genomic islands (GI) with lower GC content  
347 (<55%), that were absent in *Pf0-1* (Fig. 7 A, B). The combination of low GC content and  
348 absence from a near-relative genome suggests that these regions might have arisen by horizontal  
349 gene transfer. Further analysis revealed that each of the 3 genomic islands (GI1, GI2, and GI3)  
350 contained a highly similar region, which we labeled RE1, RE2 and RE3, respectively. These

351 genes within these regions had many annotations in common and a syntenic organization  
352 (SM14), suggesting a shared origin.

353 The maintenance of high-similarity regions is generally rare in prokaryotes, and typically  
354 requires that such regions offer a substantial evolutionary benefit. Intriguingly, the allicin-  
355 resistance-conferring clones found in the functional analysis originated within these 3 regions  
356 (Fig. 7 *B, C, D* and *E*), suggesting that the evolutionary benefit may be, in fact, increased allicin  
357 resistance. Interestingly, each genomic clone covered almost the complete corresponding repeat  
358 region, and thus the genes shared between the RE regions (Fig. 8) matches closely with those  
359 shared between the clones (Fig. 3 *B*). Given this strong evidence of importance, possible origins  
360 for the putative horizontal gene transfer (HGT) regions into the *PfAR-1* genome were  
361 investigated more closely.

362 Genes on RE1 and RE2 appeared more closely related to each other than to those on RE3  
363 from both a gene commonality (Jaccard similarity of 90% for RE1 vs RE2, compared to 54.2%  
364 for RE1 vs RE3, and 50% for RE2 vs RE3), and amino acid-similarity perspective (97.5%,  
365 87.1% and 87.2%, respectively). This suggested that RE1 and RE2 originated from a more  
366 recent sequence duplication and that RE3 resulted from an earlier duplication event from  
367 common ancestor of RE1 and RE2.

368

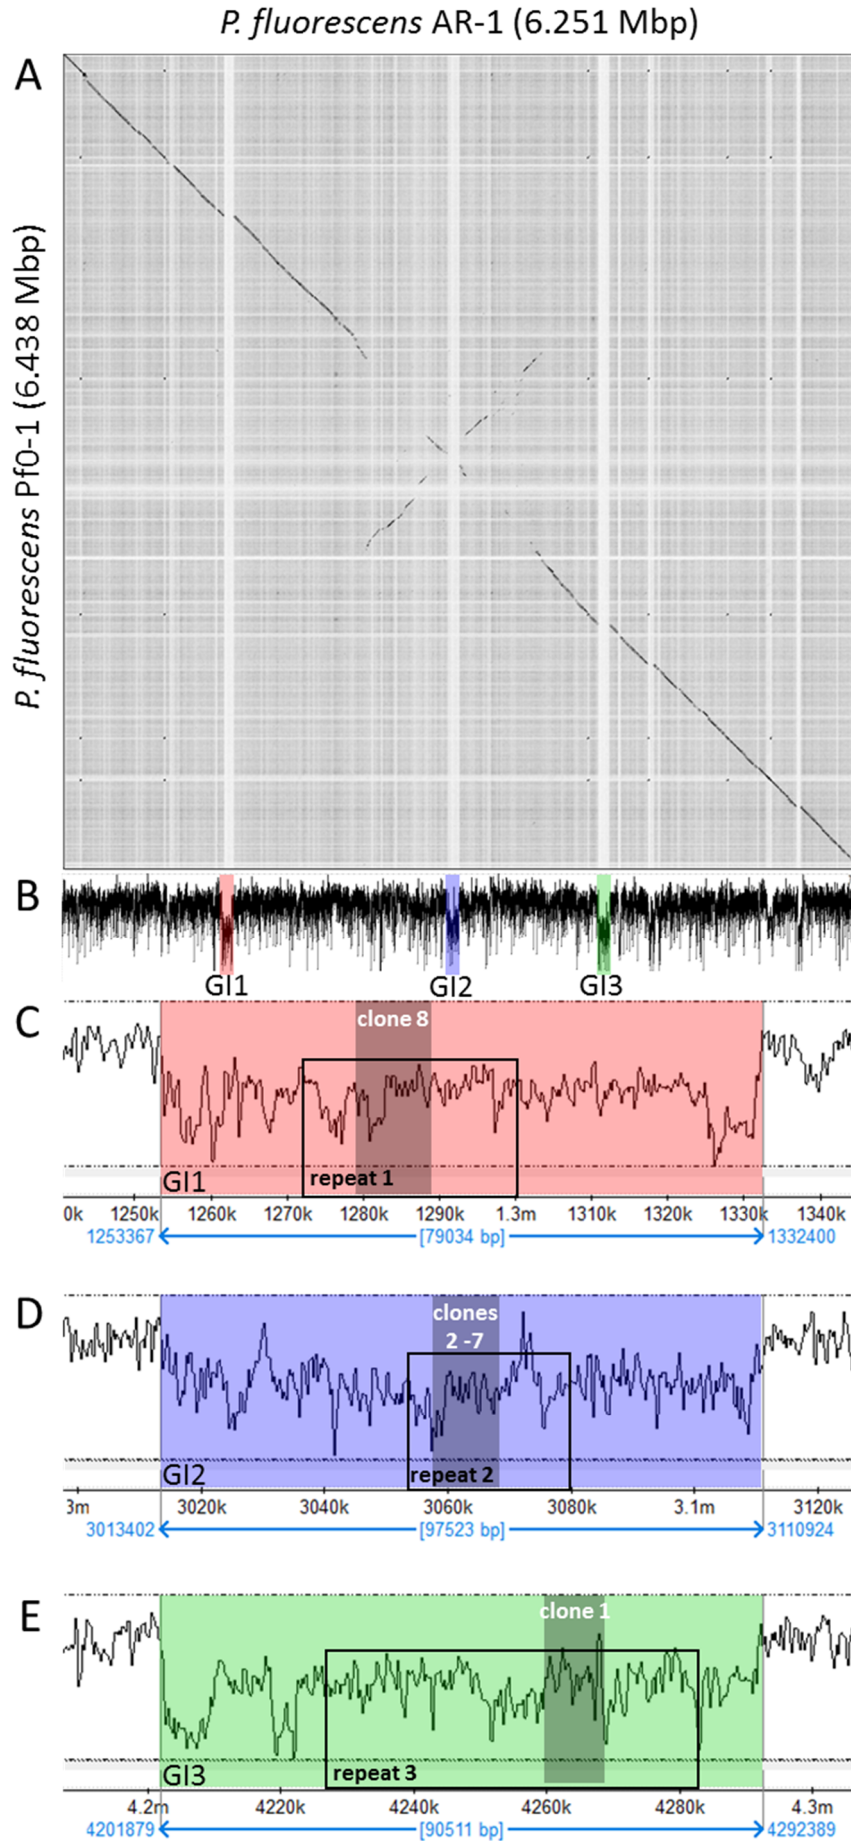

370 **Fig. 7.** Genomic characteristics of *PfAR-1*. (A) Dot plot alignment of the *PfAR-1* and *Pf0-1* genomes.  
371 Numbering is from the putative origin of replication (*oriC*) loci. The disjunctions arising because of inserts  
372 in *PfAR-1* not present in *Pf0-1* are clearly visible. (B) The GC-content of the *PfAR-1* chromosome with  
373 GI1, GI2 and GI3 marked in red, blue and green, respectively. (C) The low GC content region GI1 enlarged  
374 to show the position of repeat 1 (RE1) and the location of allacin-resistance-conferring genomic clone 8.  
375 (D) The low GC content region GI2 enlarged to show the position of RE2 and the location of allacin-  
376 resistance-conferring genomic clones 2 -7. (E) The low GC content region GI3 enlarged to show the  
377 position of RE3 and the location of allacin-resistance-conferring genomic clone 1.

378

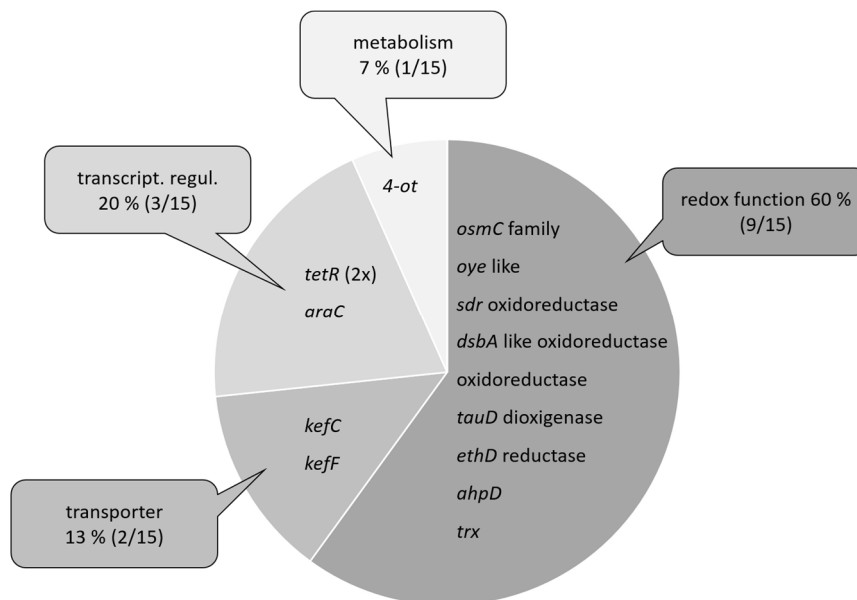

379

380 **Fig. 8:** Functional classification of the congruent set of genes from the *PfAR-1* genomic repeats RE1, RE2,  
381 and RE3 on GI1, GI2 and GI3, respectively. 13 genes are present as a single copy per repeat but the *tetR*  
382 transcriptional regulator is present in duplicate on each repeat.

383

384 **Comparison of putative RE regions across the *Pseudomonas* genus.** In order to determine  
385 potential origins for the RE regions, we arranged these sequences to form a bait set, and  
386 compared this against all 3347 available *Pseudomonas* genomes. Similar regions to the bait  
387 were detected in 8 of the complete genomes, of which 6 were from plant-pathogenic or plant-  
388 associated pseudomonads. Matching regions were also found in 56 of the draft genomes, 8 of  
389 which showed two copies of the region. One of the draft genomes had the matching region split  
390 across two contigs, although this was presumably due to incomplete assembly, rather than  
391 representing a biological signal. These similar regions ranged from effectively complete, with  
392 hits from all 26 bait groups, to highly divergent with only 5 of the bait groups found. Of the 56  
393 partial genome sequences, 37 were from plant-pathogenic or plant-associated bacteria (SM15)  
394



395 **Inter-Species Codon Analysis.** Expecting the codon usage of a horizontally transferred gene  
396 region to resemble the donor species rather than the current host, we performed a codon usage  
397 analysis to complement the bait-sequence analysis described above. For this, we compared for  
398 the full *PfAR-1* genome, the 3 RE regions, the 3347 other available *Pseudomonas* genomes,  
399 and 8 representative non-*Pseudomonas* Gammaproteobacteria. The results were plotted using  
400 Principal Component Analysis (PCA), and are shown in Fig. 9.

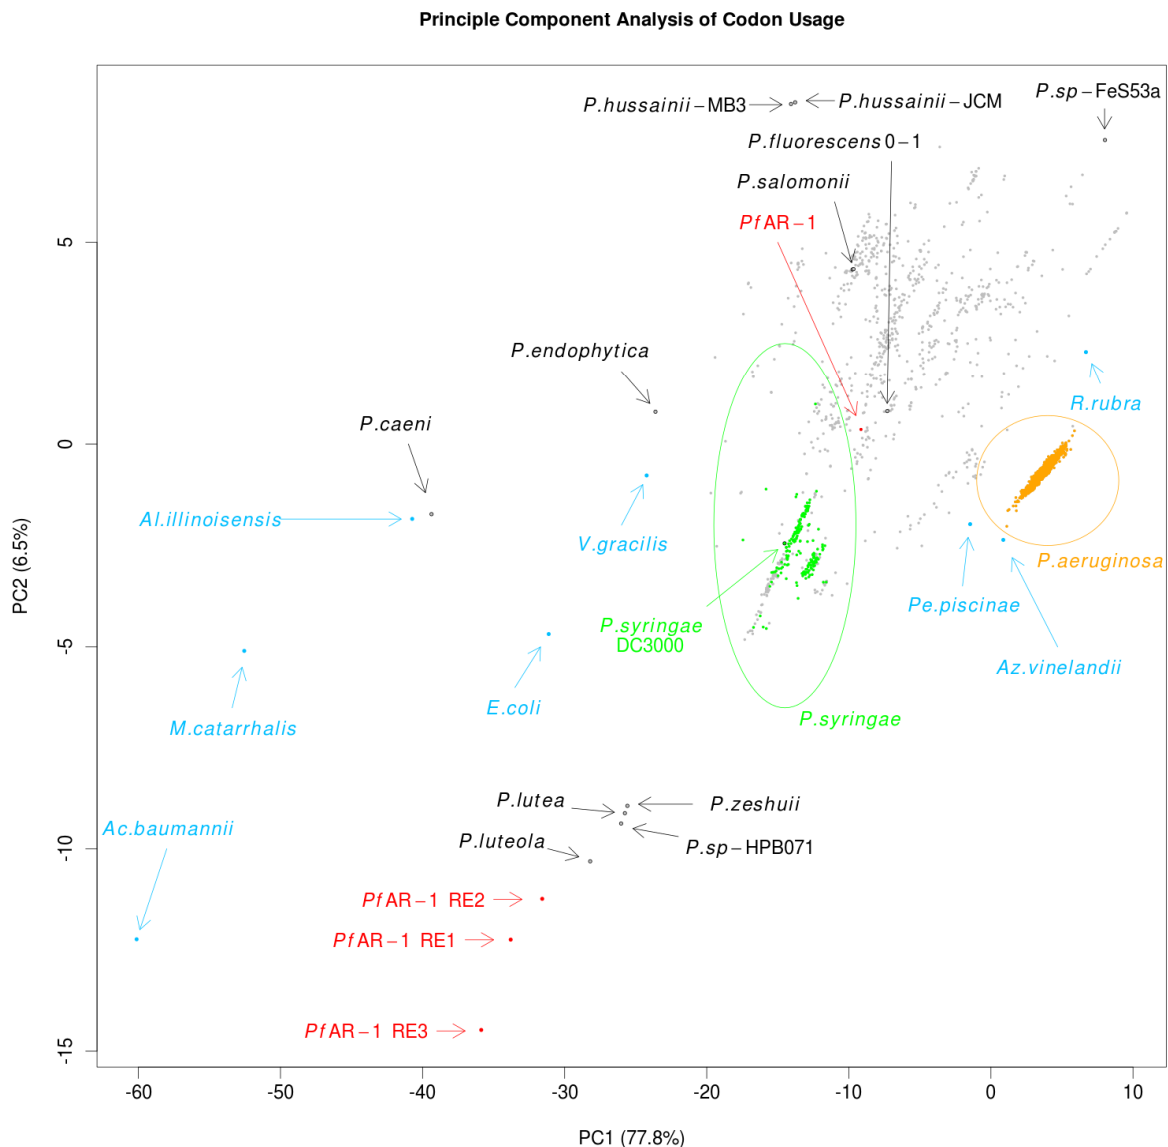

401

402 **Fig. 9.** Principle Component Analysis of codon usage in RE1, RE2 and RE3 of *PfAR-1* compared to the  
403 whole genome of *PfAR-1*, 3347 pseudomonad genomes, and 8 Gammaproteobacteria. The putative HGT  
404 regions are clearly separated from the host *PfAR-1* genome.

405 The first principle component, which accounts for almost 78% of the variation, is  
406 consistent with GC content, ranging from *Acinetobacter baumannii* with a GC content of 38.9%  
407 on one extreme, to *Rugamonas rubra* with 67% GC content on the other, and unsurprisingly,  
408 given their usually low GC content, separates the putative HGT regions from not only the  
409 *PfAR-1* whole genome, but also from the vast majority of other *Pseudomonas* genomes. The  
410 second principle component also separates the putative HGT regions from the other genomes,

411 although this component should not be over-interpreted since it accounts for only 6.5% of  
412 variation.

413 The resulting plot loosely clusters the 3 GI regions with 4 sequenced *Pseudomonas*  
414 species, namely *P. luteola*, *P. lutea*, *P. zeshuii* and *P. sp.* HPB0071. Unfortunately, none of  
415 these 4 species were found to contain matches for the bait sequences in the cross-species  
416 comparison above, and thus they are unlikely to be the origin of the putative HGT regions.

417 In addition to the genome-wide analysis, we also did a gene-window analysis of *PfAR-1*,  
418 *Pf0-1*, *Pst.* DC3000, and *P. salomonii* ICMP 14252 (SM16).

#### 419 **Phylogenetic Comparison of Whole Genome vs RE-like sequences**

420 Regions which have been horizontally transferred have, by definition, an evolutionary history  
421 distinct from their host genomes. We therefore created a phylogenetic trees for the RE-like  
422 regions across the *Pseudomonas* clade, comprising the 3 RE regions from *PfAR-1*, plus 72 RE-  
423 like regions from other species.

424 This was then compared to a whole-genome phylogenetic tree of 280 *Pseudomonas spp.*  
425 supplemented by 4 more distant genomes, namely *Azotobacter vinelandii* DJ, *Acinetobacter*  
426 *baumannii* AC29, *Escherichia coli* K12 MG1655 and *Burkholderia cenocepacia* J2315 which  
427 served as an outgroup. The 280 *Pseudomonas* genome subsets consisted of a) all 215 complete  
428 genomes, b) the 56 draft genomes showing a substantial hit against the Repeat Region bait set,  
429 as described above, and c) 9 *Pseudomonas* genomes with unusual codon usage (*P. lutea*, *P.*  
430 *luteola*, *P. sp.* HPB0071, *P. sp.* FeS53a, *P. zeshuii*, *P. hussainii* JCM, *P. hussainii* MB3, *P. caeni*  
431 and *P. endophytica*).

432 It is immediately apparent from comparison of the resulting region and whole genome  
433 trees that the RE-like regions have a distinct evolutionary history. For easier visualization of  
434 the whole genome trees, the 5 clades covering all species containing the genomic islands were  
435 manually split into sub-trees, and plotted separately. The top-level whole-genome tree, with  
436 each extracted clade reduced to a single node, is shown in SM17. The RE-like region tree for  
437 clade D is shown in Fig. 10 A, while the corresponding whole-genome tree is shown in Fig. 10  
438 B. The trees for the remaining 4 clades (A, B, C, and E), are shown in SM17.

439

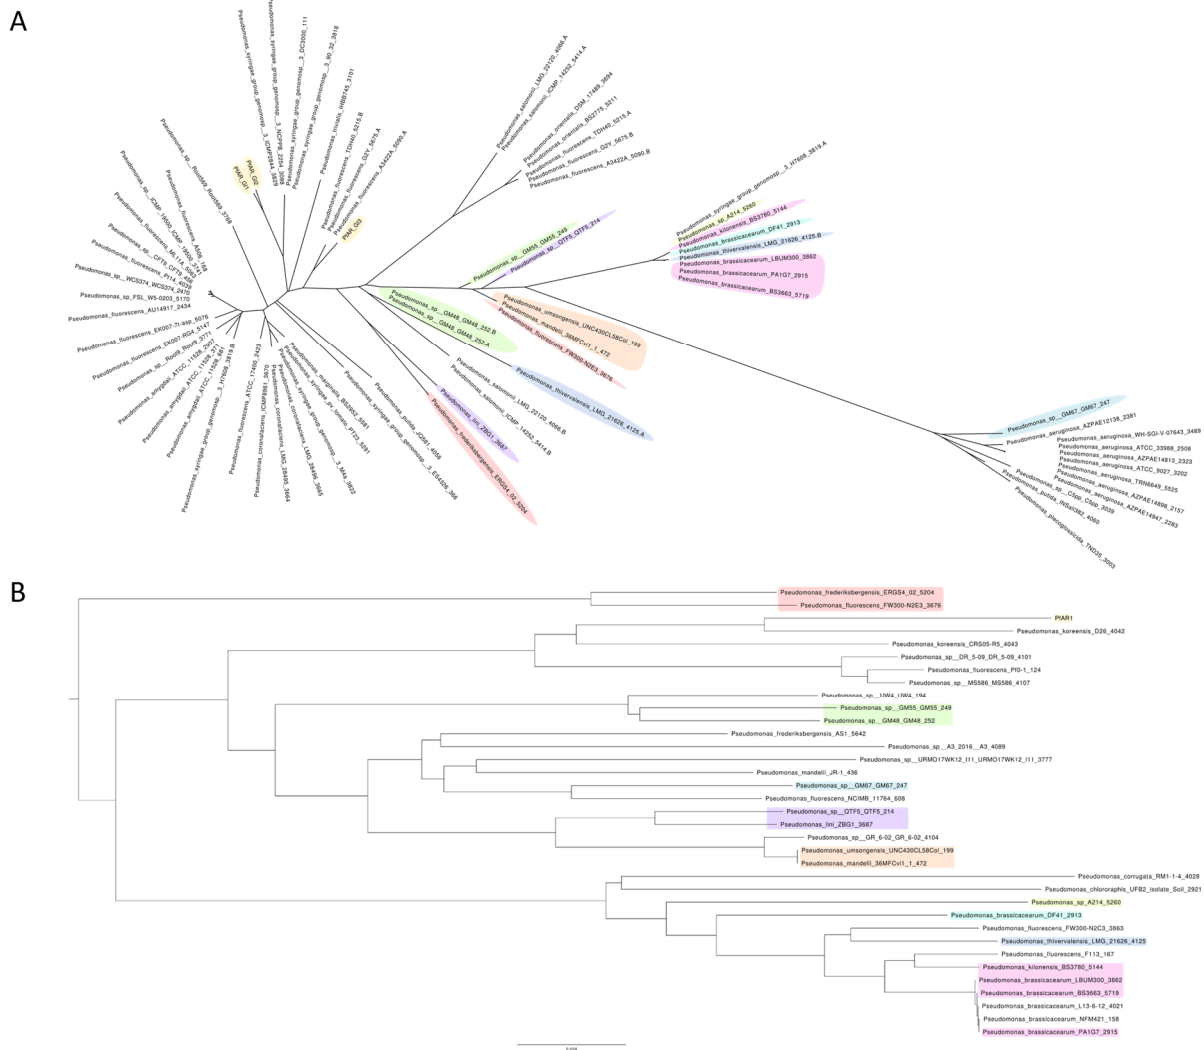

440

441 **Figure 10.** Comparison of RE-like region (*A*) and whole-genome phylogenetic (*B*) trees of a set of *PfaR-1*  
 442 close relatives.

443 **IslandViewer Analysis.** For independent confirmation of the above analysis, IslandViewer 4  
 444 (Bertelli et al., 2017) was used to assess the *PfaR-1* genome for horizontal gene transfer events.  
 445 This analysis, shown in Fig. 11, also clearly identifies the 3 putative HGT regions, although  
 446 additional weaker candidate regions are also indicated.  
 447

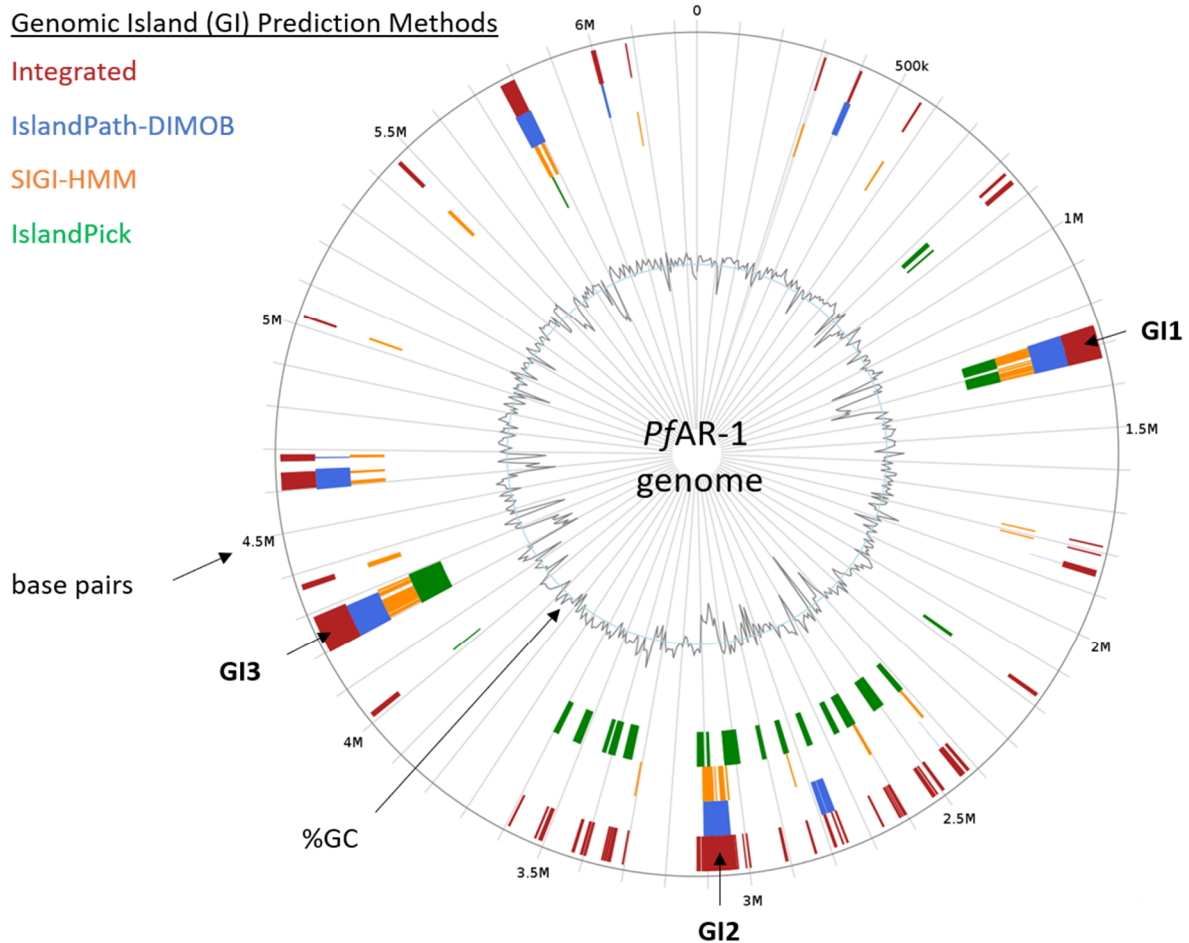

448

449 **Figure 11.** *In silico* prediction of genomic island in the *PfAR-1* genome. For *in silico* prediction, *PfAR-1*  
450 genome was checked with IslandViewer 4 (Bertelli et al., 2017) for genomic islands (GIs). Prediction is  
451 based on the three independent methods IslandPath-DIMOB (Hsiao et al., 2003), SIGI-HMM (Waack et al.,  
452 2006), and IslandPick (Langille et al., 2008). Results of all methods are integrated (dark red boxes) for  
453 island prediction. The position of GI1, GI2, and GI3 corresponds to the genomic regions with lowered GC  
454 content that contain the genomic repeat regions and the allicin resistance genes of *PfAR-1*.

455 **Syntenic regions to *PfAR-1* REs in *P. syringae* pv. *tomato* DC3000 and *Pseudomonas***  
456 ***salomonii* ICMP 14252.** Data base comparisons revealed that some plant-associated bacteria,  
457 for example the garlic pathogen *P. salomonii* ICMP 14252 (Gardan et al., 2002), and tomato  
458 and *A. thaliana* pathogen *P. syringae* pv. *tomato* DC3000 (*Pst* DC3000) (Cuppels 1986; Buell  
459 et al. 2003), have regions syntenic with RE1 (Fig. 12). *PfAR-1* RE1 contains a *glr* gene and  
460 two gene groups (from *ahpD* → *kefC* and from *trx* ← *osmC*) that are conserved in RE2 and  
461 RE3. These two groups are present in the two syntenic regions in the genome of *P. salomonii*  
462 ICMP 14252 and in one syntenic region in *Pst* DC3000 (Fig. 12). In contrast, the French bean  
463 (*Phaseolus vulgaris*) pathogen *Ps1448A* has no genes with significant similarity to any of the  
464 allicin-resistance-conferring congruent gene set from *PfAR-1* clones. *Ps1448A* is fully  
465 sequenced (Joardar et al., 2005) and is quite similar at the nucleotide level to *Pst* DC3000 with  
466 an average nucleotide identity (ANI) of 86.87 %. In comparison, the ANI between *PfAR-1* and  
467 *Pf0-1* is 85.94 % (SM18).

468

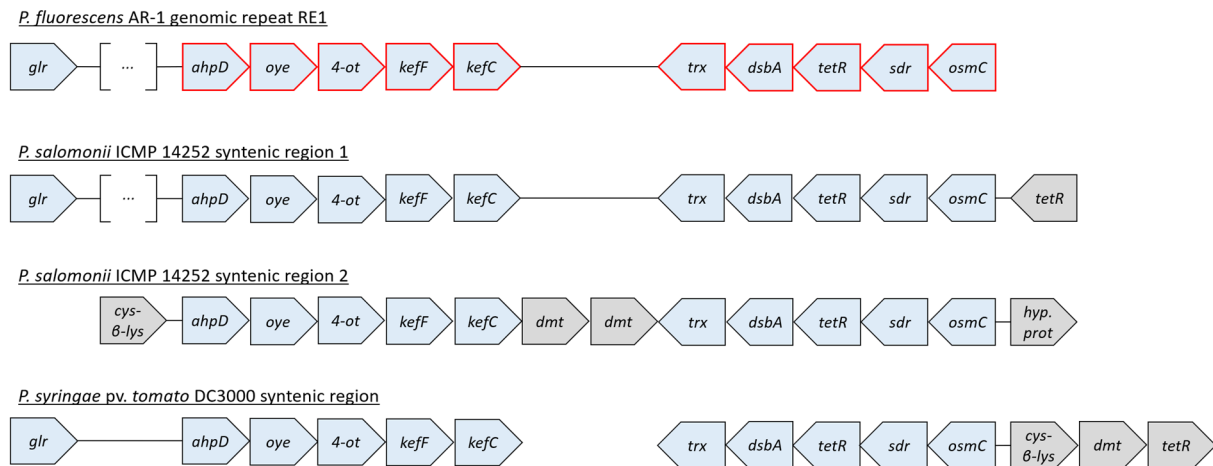

469

470 **Figure 12: A set of ten genes is conserved in the genomic repeats of *PfAR-1* and in syntenic regions**  
 471 **of *P. salomonii* ICMP 14252 and in *P. syringae* pv. *tomato* DC3000.** *cys-β-lys*: cystathione-β-lyase; *dmt*:  
 472 Permease of the drug/metabolite transporter (*dmt*) superfamily; the remaining genes are referred to  
 473 elsewhere in this study. The distance between the different genes does not represent the actual intergenic  
 474 distances since the gene blocks were graphically aligned to highlight the conservation. In case of *glr* of  
 475 *PfAR-1* RE1 and *P. salomonii* syntenic region 1, these genes are farther upstream of the highlighted genes  
 476 with several genes in between (represented by the squared brackets with three dots). Red highlighted genes  
 477 represent the congruent set of genes also found in the resistance-conferring genomic clones of *PfAR-1*.  
 478 Coordinates of syntenic regions are given in SM19.

479 When *PfAR-1*, *P. salomonii* ICMP14252, *Pst* DC3000 and *Ps*1448A were tested in a  
 480 simple streak assay, we observed that *PfAR-1* and *P. salomonii* are most resistant against  
 481 alliin, followed by *Pst* DC3000, then with a much higher susceptibility, by *Ps*1448A. The  
 482 transfer of genomic clone 1 of *PfAR-1* which contained the core genes described above, raised  
 483 the alliin resistance of *Ps*1448A to approximately the same level of alliin resistance observed  
 484 in *Pst* DC3000 (Fig. 13).

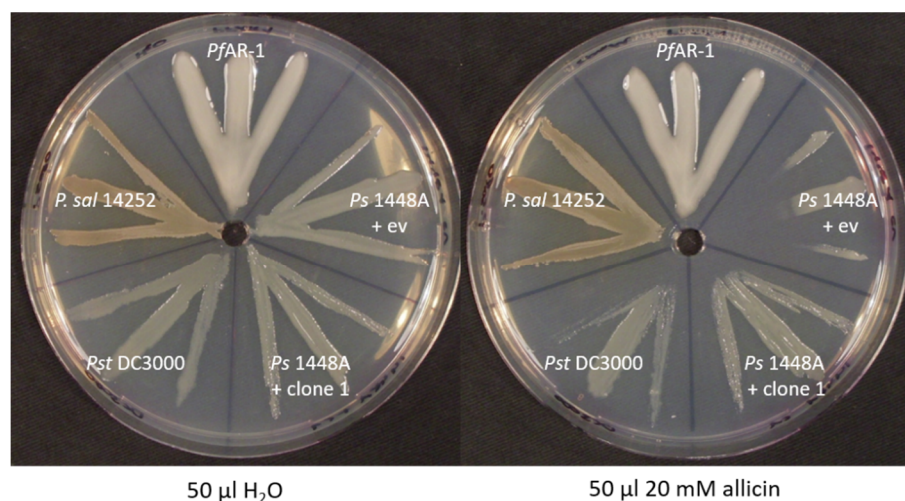

485

486 **Figure 13: The alliin resistance of different bacteria correlates with the number of gene copies that**  
 487 **are syntenic to the core fragment of the genomic clones from *PfAR-1*.** *Ps*1448 A was either transformed  
 488 with *PfAR-1* genomic clone 1 or pRU1097 (empty vector control), while the other strains were not  
 489 genetically modified. *PfAR-1* has three copies of a set of ten genes that were identified on genomic clones  
 490 (e.g. genomic clone 1) that confer resistance to alliin in *P. syringae* strain 4612. *P. salomonii* ICMP 14252  
 491 has two copies of this set of genes in its genome while *P. syringae* pv. *tomato* DC3000 has one and *P.*  
 492 *savastanoi* 1448A none.

493

494 **The role of glutathione reductase (Glr) in PfAR-1 allicin resistance.** Both GI1 and GI2 have  
495 a *glr* gene (*glr2*, *glr3*) outside of the allicin-resistance-conferring genomic clone regions in RE1  
496 and RE2, respectively, and a further *glr* gene (*glr1*) is present on the PfAR-1 chromosome.  
497 Furthermore, PfAR-1 also had a two-fold higher basal Glr activity than Pf0-1 (Fig. 14). Since  
498 allicin targets -SH groups in proteins and GSH metabolism is critical for resistance to allicin,  
499 we investigated the potential contribution of Glr to allicin-resistance in PfAR-1.  
500

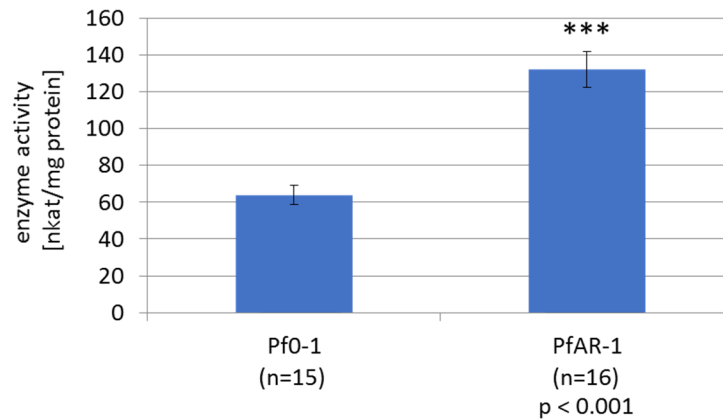

501

502 **Fig. 14.** Glutathione reductase activity in protein extracts from Pf0-1 and PfAR-1. Significance was tested  
503 with student's t-test ( $P < 0,001$ ).

504 The importance of GSH metabolism and Glr for allicin-resistance is shown in Fig. 15.  
505 The agar-diffusion test showed that deleting the *glr* gene from *E. coli* BW25113 increased its  
506 susceptibility to allicin compared to the wt (Fig. 15 A and B). Allicin-resistance was restored  
507 by complementing the BW25113  $\Delta glr$  strain with the chromosomal *glr1* gene from PfAR-1  
508 (Fig. 15 C).

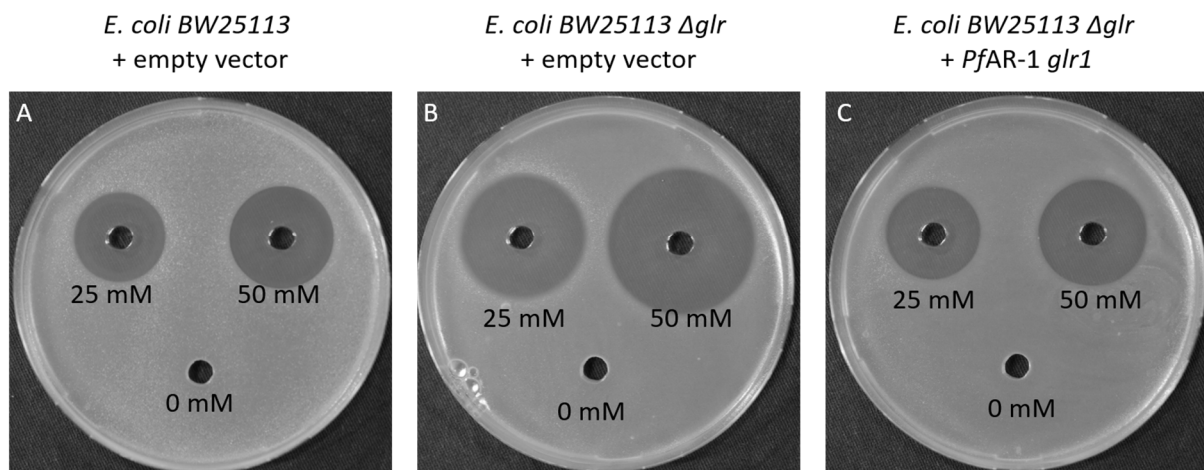

509

510 **Figure 15.** PfAR-1 glutathione reductase (*glr1*) complements *E. coli* BW25113 glutathione reductase  
511 deletion mutant ( $\Delta glr$ ). 40  $\mu$ L of allicin solution (or water) were pipetted into wells in *E. coli* -seeded  
512 medium and the plates incubated over-night at 37°C.

513

## 514 Discussion

515 The garlic defense substance allicin is a potent thiol reagent which targets accessible -SH groups  
516 in proteins and the cellular redox buffer glutathione (Borlinghaus et al., 2014). Allicin has been  
517 shown to *S*-thioallylate several cysteine-containing proteins in bacteria (Müller et al., 2016, Loi  
518 et al., 2019), and has been described as a redox toxin (Gruhlke et al., 2010). *S*-thioallylation by  
519 allicin is reversible, and sublethal doses suppress bacterial multiplication for a period of time,  
520 the length of which is dose-dependent, before growth resumes (Müller et al., 2016). Adding a  
521 lethal dose of allicin to a high-density bacterial culture and plating out for survivors, the usual  
522 strategy to isolate antibiotic-resistant mutants, has proven ineffective with allicin. Because  
523 allicin affects such a broad catalogue of cellular proteins, it is not easy for an organism to adapt  
524 to it by simple mutation. Nevertheless, the degree of allicin resistance varies between different  
525 bacterial isolates and, although the genetic basis for this variation was unknown, we reasoned  
526 that we might find organisms with high allicin-resistance associated with the garlic bulb itself  
527 as a niche-habitat. This was indeed the case, and we were able to isolate a highly allicin-resistant  
528 bacterium, which we named *P. fluorescens* Allicin Resistant-1 (*PfAR*-1), from a garlic bulb. In  
529 inhibition zone tests, comparison with *E. coli* K12 DH5 $\alpha$  or *P. syringae* 4612, *PfAR*-1 showed  
530 an exceptionally high degree of allicin-resistance (Fig. 1). We employed parallel approaches of  
531 functional testing of random genomic clones, and whole genome sequencing, to characterize  
532 genes conferring allicin-resistance to *PfAR*-1 (Figs 2 & 3). Interestingly, positive clones  
533 conferred allicin-resistance not only to closely-related pseudomonads, but also to distantly  
534 related bacteria such as *E.coli* (Figs 4 & 5).

535 Resistance-conferring *PfAR*-1 genomic clones contained 16 unique genes in total, with a  
536 congruent set of 8 genes shared by all clones (Fig. 3). Since allicin is a redox toxin causing  
537 oxidative stress, it was interesting to observe that half of these genes were annotated with redox-  
538 related functions (Fig. 3). Moreover, these genes were linked to reports in the literature in the  
539 context of oxidative and disulfide stress (Table 1).

540 Transposon mutagenesis indicated that the *dsbA*, *trx*, *kefC*, and *oye* genes worked  
541 together, contributing incrementally to confer allicin-resistance to a susceptible recipient. The  
542 contributions of the *dsbA* and *trx* genes were greater than those of the *kefC* and *oye* genes. In  
543 contrast, the effect of a mutation in *ahpD* alone was major, with transposon mutants showing a  
544 similar phenotype to the susceptible parent (Fig. 5). These results are consistent with a  
545 multicomponent mechanism of allicin resistance. Since the genes involved do not have  
546 annotated genes that code for significantly similar peptides in the *Pf0*-1 reference strain, or *E.*  
547 *coli*, this suggests that the genes might be of external origin and would explain why spontaneous  
548 mutation to a gain-of-resistance upon allicin selection was not observed in axenic cultures under  
549 lab conditions.

550 To investigate individual contributions to the resistance phenotype, genes were cloned in  
551 a broad-host-range overexpression vector and investigated in *Ps4612*. We observed a strong  
552 increase in allicin resistance by the overexpression of *ahpD* or *dsbA* alone, with either gene  
553 conferring almost as much resistance as the complete genomic clone (Fig 6). However, we  
554 observed no effect for *trx* or *oye* overexpression; although transposon insertions in the complete  
555 genomic clone led to a decrease in resistance (Fig. 5). This might indicate that the function of  
556 the single gene depends on the function of another gene or genes from the genomic fragment,  
557 or that there are downstream effects of the Tn-insertion. Overexpression lines for *osmC* and  
558 *kefC* were not found in *Ps4612*, most likely due to toxic effects. In this regard, the activity of

559 KefC is normally tightly regulated by KefF and GSH, and an imbalance could lead to a toxic  
560 decrease in cellular pH and loss of potassium, which is needed to maintain turgor and enable  
561 cell growth and division (Epstein, 2003). Overexpression of *sdr* and *oye* showed no phenotype  
562 (not shown).

563 In parallel to the gain-of-function approach, genome analysis revealed unique features of  
564 the *PfAR-1* genome compared to the *Pf0-1* reference strain. Thus, three large genomic regions  
565 (GI1 to GI3, Fig. 7) were identified, with sizes between 79 to 98 kbp, having a lower GC content  
566 ( $\Delta\%GC$  approximately 5-10 %). These GI's contained repeat regions RE1, RE2 and RE3 with  
567 the resistance-conferring clones identified in the functional analysis being contained within  
568 them (Fig. 3 B, 8).

569 A codon usage analysis showed differences in RE1, RE2 and RE3 compared to the core  
570 *PfAR-1* genome (Fig. 9); which was a strong indication that these regions were obtained by  
571 horizontal gene transfer (HGT), and comparison with other *Pseudomonas* spp. suggested that  
572 the origin may lie outside this genus. The HGT hypothesis was strongly supported by our  
573 phylogenetic analysis (Fig. 10, SM17), and an independent *in silico* analysis using  
574 IslandViewer 4 (Fig. 11). Thus, by current selection criteria, regions RE1, RE2 and RE3, and  
575 most likely the complete GI1, GI2 and GI3 regions can be reliably considered to be *bona fide*  
576 genomic islands which were obtained by horizontal gene transfer. The preponderance of genes  
577 with redox-related functions in the RE regions fitted well with a role in resistance against allicin.  
578 It is unusual for multiple copies of genes to be maintained in bacteria because of the genomic  
579 instability that arises through homologous recombination leading to genome rearrangements  
580 and loss of essential interim sequences (Rocha, 2003). The presence of such large, widely  
581 spaced REs in the *PfAR-1* genome, suggested that there was a high selection pressure to  
582 maintain them. The latter is presumably associated with the allicin-resistance-conferring  
583 functions of many of the genes and this fits with the competitive advantage they offer over other  
584 bacteria in occupying the garlic niche.

585 Although the GI donor remains unknown, phylogenetic analysis identified similar  
586 syntenic regions to the REs from *PfAR-1* in other bacterial genomes (Fig. 12). Thus, the garlic  
587 pathogen *P. salomonii* ICMP14252 has two syntenic regions, and the well-described model  
588 pathogen *P. syringae* pv. *tomato* DC3000 has one syntenic region. In *P. salomonii* ICMP 14252  
589 and *Pst*. DC3000 the syntenic regions have the set of ten core genes identified in genomic clones  
590 1-7 of *PfAR-1* (Fig.12). Furthermore, we observed that the species with multiple copies of the  
591 syntenic regions, 3 for *PfAR-1* and 2 for *P. salomonii*, showed higher allicin resistance than  
592 those with only one or zero copies, namely *Pst* DC3000 and *Ps* 1448A, respectively (Fig 13).  
593 This further supports our findings that these regions are putative allicin resistance factors in  
594 *PfAR-1*. *P. salomonii* causes the café-au-lait disease on garlic (Gardan et al., 2002) and its high  
595 degree of allicin resistance corresponds well to its niche as a pathogen of garlic. One might  
596 expect that a pathogen like *P. salomonii* could be the origin of allicin resistance genes in  
597 *PfAR-1*, but according to our codon usage analysis, the allicin resistance regions in *P. salomonii*  
598 ICMP14252 are quite distinct from the remainder of the genome, and therefore were also likely  
599 obtained by horizontal gene transfer (Fig 9, 10). *Pst* DC3000 is a model pathogen with a fully  
600 sequenced genome (Buell et al., 2003) and is pathogenic on tomato and on the model organism  
601 *Arabidopsis thaliana* (Xin and He, 2013). To the best of our knowledge, the genes and their  
602 function in allicin resistance have not been described before in this well studied strain. Although  
603 our experiments suggest that the resistance conferred by the core-region is allicin-specific



604 (Fig. 4), oxidative stress has manifold causes and some genes in the syntenic region may help  
605 to counter its effects. In this regard, it was reported that a transposon insertion in *dsbA* from the  
606 core genome of *Pst* DC3000 led to decreased virulence of *Pst* DC3000 on *A. thaliana* and on  
607 tomato (Kloek et al., 2000). Based on this study, it seemed that the remaining *dsbA* copy from  
608 the syntenic region of *Pst* DC3000 was not sufficient to functionally complement the loss of  
609 the *dsbA* in the core genome; perhaps indicating subtly different functions between the two. It  
610 is intriguing to speculate that the syntenic region might help to overcome the oxidative burst  
611 associated with plant defense, as well as protecting against more specifically redox-active  
612 sulfur-containing plant defense substances, like allicin. The oxidative burst in plants is a general  
613 defense response to avirulent pathogens (Lamb & Dixon, 1997), and it would be interesting to  
614 see if loss of syntenic genes other than *dsbA* in *Pst* DC3000 also lead to a reduction of virulence.  
615 Moreover, a recent study reported plasmid-born onion virulence regions (OVRs) in different  
616 *Pantoea ananatis* strains that are pathogenic on onion (Stice et al., 2018). The OVR-A region  
617 contained a subset of genes that we describe in our present study as allicin-resistance genes.  
618 More specifically, *dsbA*, which was annotated in *P. ananatis* as *isomerase* in OVR-A, *oye* (as  
619 *alkene reductase*), *trx*, *ahpD* (annotated as *alkylhydroperoxidase*), *glutathione disulfide*  
620 *reductase*, *sdr*, and *osmC*, were all present. Although onion does not produce allicin, it has  
621 many sulfur-containing redox-active compounds which may be involved in defense (Imai et al.,  
622 2002). Nevertheless, there are several plant pathogenic bacteria, e.g. *P. savastanoi* 1448A,  
623 which have no equivalent syntenic region but are successful plant pathogens in their own right.  
624 Therefore, there is clearly no absolute requirement for the syntenic region to enable colonization  
625 of plants as a habitat *per se*. However, in this regard it should be noted that a comprehensive  
626 genomic analysis of plant-associated bacteria to identify protein domains associated with  
627 adaptation to growth in or on plants, showed that 7 of the 10 genes we identified in the syntenic  
628 region contained plant-associated domains as described by the authors (Levy et al., 2018).  
629 Furthermore, of the bacteria showing homology to the syntenic region, 43/64 were from either  
630 plant-pathogenic or plant-associated bacteria (SM15). This observation is compatible with a  
631 general function of the syntenic region supporting colonization of the plant environment,  
632 perhaps acting favorably in an oxidative stress situation, in addition to a specific role in  
633 resistance to allicin and other sulfur-containing defense compounds.

634 Allicin targets *inter alia* the GSH pool in plants, and GSH metabolism has been shown to  
635 be important in the resistance of bacteria, yeast and *Arabidopsis thaliana* to allicin (Müller et  
636 al., 2016; Gruhlke et al. 2010; Leontiev et al., 2018). Thus, it was interesting to note that *PfAR*-  
637 1 has three copies of *glr*, one each on RE1 and RE2, and one in the core genome. This is quite  
638 remarkable since bacteria normally have only one *glr* copy. Exceptions, like *Pst* DC3000 and  
639 *P. salomonii* ICMP14252, have an additional *glr* gene that was also very likely obtained by  
640 horizontal gene transfer as in *PfAR*-1. Here, we demonstrated that the higher copy number of  
641 *glr* in *PfAR*-1 correlated with a 2-fold higher basal GLR enzyme activity compared to *Pf0*-1  
642 with only one copy of *glr* (Fig. 14). The importance of Glr activity for tolerance to allicin is  
643 clear from the enhanced sensitivity to allicin of a *Δglr* knockout in *E. coli*. Moreover, we were  
644 able to complement this phenotype by introducing *glr1* from *PfAR*-1 (Fig. 15). Glr recycles  
645 oxidized glutathione (GSSG) to GSH using NADPH as a reductant. GSH protects cells from  
646 oxidative stress, either by direct reaction with pro-oxidants, thus scavenging their oxidative  
647 capacity, or by serving as an electron donor for detoxifying enzymes like glutathione peroxidase  
648 and glutaredoxins (Meister and Anderson., 1983). It was shown that allicin treatment leads to  
649 oxidation of GSH to GSSG in yeast (Gruhlke et al., 2010), and to the formation of S-

650 allylmercaptogluthione (GSSA) (Horn et al., 2018). In yeast, GSSA is reduced by Glr to  
651 release GSH, shown by *in vitro* activity measurements with GSSG and GSSA as substrates, and  
652 *in vivo* by chemical complementation of the *Δgsh1* phenotype of yeast cells with GSSA (Horn  
653 et al., 2018). Therefore, it is clear that Glr is an important resistance factor for *PfAR-1* to allicin  
654 and this fits with the HGT hypothesis allowing *PfAR-1* to exploit its ecological niche. Gram-  
655 positive bacteria, such as *Staphylococcus aureus*, have bacillothiol rather than GSH and in an  
656 independent investigation we showed that the bacillothiol reductase YpdA, which is the  
657 functional equivalent of Glr, reduced *S*-allylated bacillothiol (BSSA) and is important for the  
658 resistance of *Staphylococcus* to allicin (Loi et al., 2019). Furthermore, GSH negatively  
659 regulates the activity of KefC but GSH-conjugates stimulate KefC activity via Keff (Fig. 16)  
660 (Miller et al., 2000, Ferguson et al., 1997). Thus, GSH inhibits K<sup>+</sup>-efflux and *E. coli Δgsh*  
661 mutants lose K<sup>+</sup>-ions similarly to cells stressed with electrophiles such as *N*-ethylmaleimide  
662 (NEM) (Meury & Kepes 1982; Elmore et al., 1990). KefC activity acidifies the cytoplasm and  
663 protects against oxidative stress caused by electrophiles such as NEM and methylglyoxal;  
664 presumably because the lowered pH works against thiolate ion formation (Ferguson 1993,  
665 1995, 1996, 1997; Poole, 2015). KefC activation would be expected to protect against oxidative  
666 stress caused by the electrophile allicin in the same way (Fig. 16).

667 Because *PfAR-1* lacks the *6-phospho-fructokinase* gene necessary for glycolysis, it uses  
668 the Entner Dodouroff Pathway (EDP) to metabolize glucose to pyruvate. During oxidative  
669 stress, the EDP is advantageous over glycolysis because, in addition to NADH, NADPH is  
670 produced (Conway, 1992). For example, it was shown for *P. putida* that key enzymes of the  
671 EDP are upregulated upon oxidative stress (Kim et al., 2008). NADPH is used as reducing  
672 equivalents for antioxidative enzymes like glutathione reductase and Oye-dehydrogenases.  
673 Thus, cells using the EDP have a further source of NADPH in addition to the pentose phosphate  
674 pathway. Moreover, in *Mycobacterium tuberculosis* the AhpD enzyme depends on NADH  
675 consumption (Bryk et al., 2002), and thus, *PfAR-1* could be able to tap into two pools of  
676 reducing equivalents to defend against allicin stress (Fig. 16).

677 Disulfide bond protein A (DsbA) is located in the periplasm (Shouldice et al., 2011), and  
678 based on its protein domain content, in *PfAR-1* DsbA might act as disulfide isomerase or as a  
679 chaperone. The Dsb system might be supported with reducing equivalents from the cytosol by  
680 thioredoxin (Trx) and additional membrane proteins as previously reported for *E. coli* (Katzen  
681 and Beckwith, 2000).

682 How alkylhydroperoxidase D (AhpD) might protect *PfAR-1* against allicin is so far  
683 unknown. Possibly, as in *Mycobacterium tuberculosis*, it might act by using NADH to reduce  
684 oxidized molecules arising from oxidative stress (Bryk et al., 2002).

685 All these data reinforce the central importance of GSH metabolism and redox enzymes  
686 in the resistance of cells to the electrophilic thiol reagent allicin. The maintenance of multiple  
687 copies of resistance genes, obtained by HGT, probably facilitates exploitation of the garlic  
688 ecological niche by *PfAR-1* in competition with other bacteria.

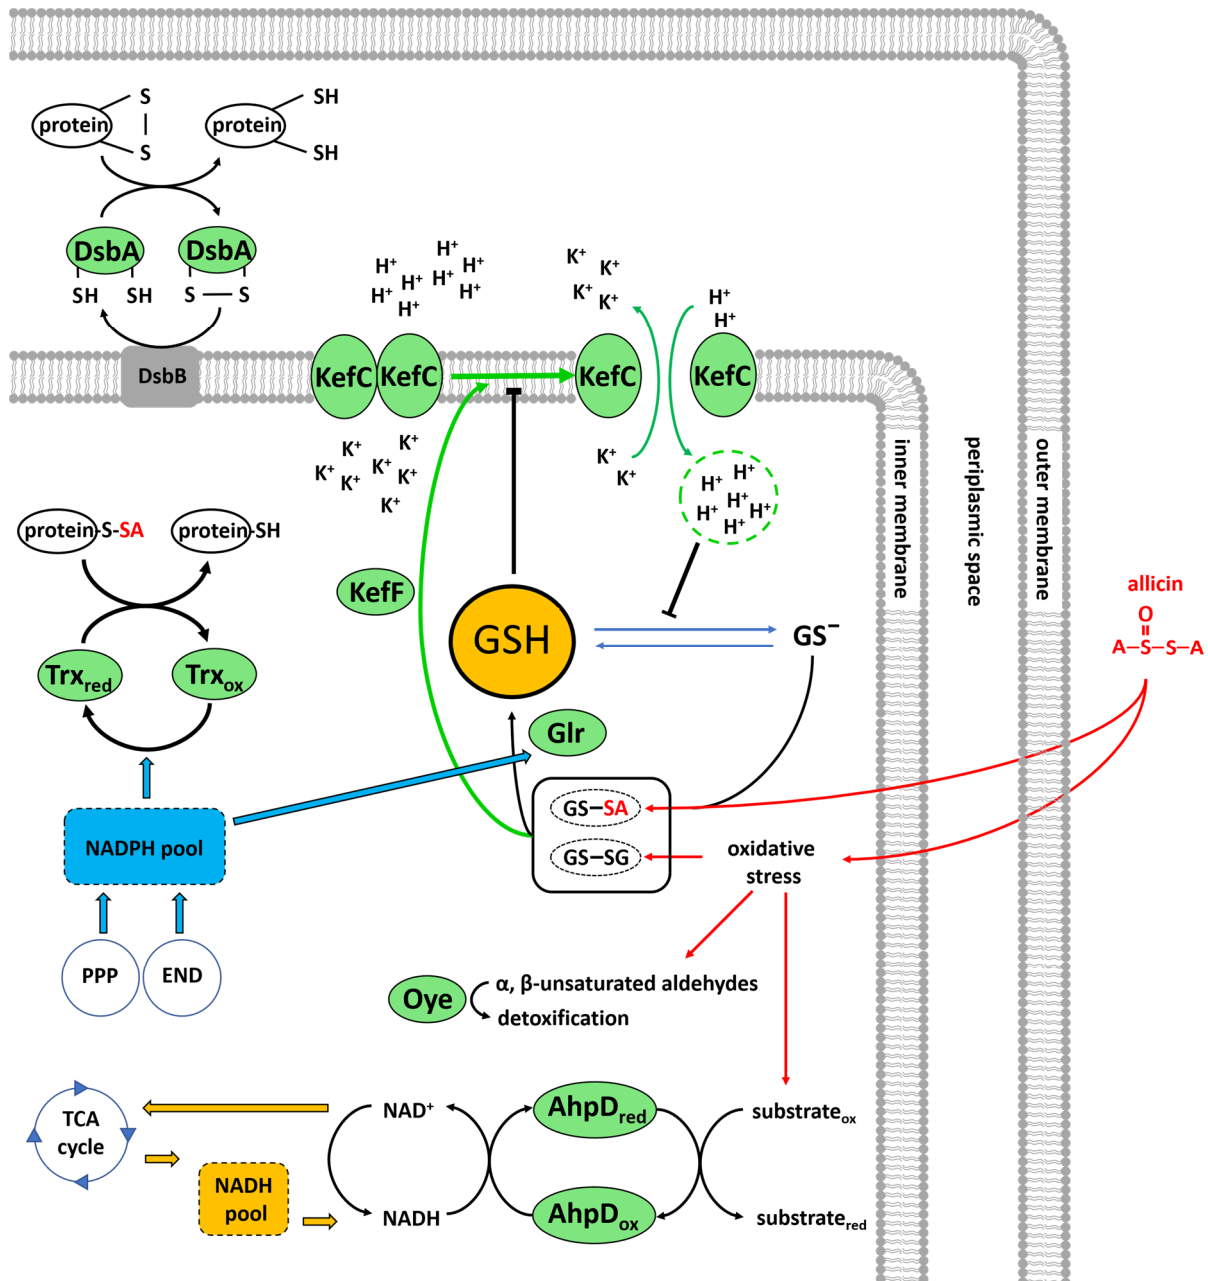

689

690 **Figure 16: Suggested model for allicin resistance in *Pseudomonas fluorescens* Allicin Resistant-1.**

691 Disulfide bond protein A (DsbA), thioredoxin (Trx), glutathione (GSH), *S*-allylmercaptogluthione

692 (GSSA), Glutathione reductase (Glr), glutathione-regulated potassium efflux system (KefF, KefC),

693 alkylhydroperoxidase D (AhpD), pentose phosphate pathway (PPP), Entner/Doudoroff pathway (END).

694

695 **Acknowledgements.** Financial support from the RWTH Aachen University (J.B., A.J.S., MCHG,) is

696 gratefully acknowledged. J.B. was supported by an RFwN Ph.D. stipendium. This research did not

697 receive any specific grant from funding agencies in the public, commercial, or not-for-profit sectors.

698 Nikolaus Schlaich ist thanked for helpful discussions and Ulrike Noll for proof-reading the MS.

699

700

## 701 References

- 702 Aziz, R.K., Bartels, D., Best, A. A., DeJongh, M., Disz, T., Edwards, R. A., Formsma, K., Gerdes, S.,  
703 Glass, E. M., Kubal, M., Meyer, F., Olsen, G. J., Olson, R., Osterman, A. L., Overbeek, R. A., McNeil,  
704 L. L., Paarmann, D., Paczian, T., Parrello, B., Pusch, G. D., Reich, C., Stevens, R., Vassieva, O.,  
705 Constein, V., Wilke, A., and Zagnitko, O. The RAST Server: Rapid Annotations using Subsystems  
706 Technology. *BMC Genomics* 9, 75 (2008).  
707
- 708 Bankevich, A., Nurk, ., Antipov, D., Gurevich, A. A., Dvorkin, M., kulikov, A. S., Lesin, V. M.,  
709 Nikolenko, S. I., Pham, S., Pribelski, A. D., Pyshkin, A. V., Sirotkin, A. V., Vyahhi, N., Tesler, G.,  
710 Alekseyev, M. A., and Pevzner, P. A. SPAdes: A New Genome Assembly Algorithm and Its  
711 Applications to Single-Cell Sequencing. *Journal of Computational Biology* 19, 455-477 (2012)  
712
- 713 Bardwell, J. C. A., McGovern, K., and Beckwith, J. Identification of a protein required for disulfide  
714 bond formation in vivo. *Cell* 67, 581-589 (1991)  
715
- 716 Bertelli, C., Laird, M. R., Williams, K. P., Simon Fraser University Research Computing Group, Lau,  
717 B. Y., Hoad, G., Winsor, G. L., and Brinkman, F. S. L. IslandViewer 4: expanded prediction of genomic  
718 islands for larger-scale datasets. *Nucleic Acids Research* 45, W30-W35 (2017)  
719
- 720 Block, E. *Garlic and the Other Alliums. The Lore and the Science*, 1st ed.; RSC Publishing: Cambridge,  
721 UK, 2010;  
722 ISBN 10:1849731802  
723
- 724 Bolger, A. M., Lohse, M., and Usadel, B. Trimmomatic: a flexible trimmer for Illumina sequence data.  
725 *Bioinformatics* 30, 2114-2120 (2014)  
726
- 727 Borlinghaus, J., Albrecht, F., Gruhlke, M. C. H., Nwachukwu, I. D., and Slusarenko, A. J. Allicin:  
728 Chemistry and Biological Properties. *Molecules* 19, 12591-12618 (2014)  
729
- 730 Brettin, T., Davis, J. J., Disz, T., Edwards, R. A., Gerdes, S., Olsen, G. J., Olson, R., Overbeek, R.,  
731 Parrello, B. Pusch, G. D., Shukla, M., Thomason III, J. A., Stevens, R., Vonstein, V., Wattam, A. R.,  
732 and Xia, F. RASTtk: A modular and extensible implementation of the RAST algorithm for building  
733 custom annotation pipelines and annotating batches of genomes. *Scientific Reports* 5, 8365 (2015)  
734
- 735 Bryk, R., Lima, C. D., Erdjument-Bromage, H., Tempst, P., and Nathan, C. Metabolic Enzymes of  
736 Mycobacteria Linked to Antioxidant Defense by a Thioredoxin-Like Protein. *Science* 295, 1073-1077  
737 (2002)  
738
- 739 Buell, C. R., Joardar, V., Lindeberg, M., Selengut, J., Paulsen, I. T., Gwinn, M. L., Dodson, R. J., Deboy,  
740 R. T., Durkin, A. Sc., Kolonay, J. F., Madupu, R., Daugherty, S., Brinkac, L., Beanan, M. J., haft, D.  
741 H., Nelson, W. C., Davidsen, T., Zafar, N., Zhou, L., Liu, J., Yuan, Q., Khouri, H., Federova, N., Tran,  
742 B., Russell, D., Berry, K., Utterback, T., van Aken, S. E., Feldblyum, T. V., D'Ascenzo, M., Deng, W.-  
743 L., Ramos, A. R., Alfano, J. R., Cartinhour, S., Chatterjee, A. K., Delaney, T. P., Lazarowitz, S. G.,  
744 Martin, G. B., Schneider, D. J., Tang, X., Bender, C. L., White, O., Fraser, C. M., and Collmer, A. The  
745 complete genome sequence of the *Arabidopsis* and tomato pathogen *Pseudomonas syringae* pv. *tomato*  
746 DC3000. *PNAS* 100, 10181 (2003)  
747

- 748 Burdon, J. J., and Thrall, P. H. Coevolution of Plants and Their Pathogens in Natural Habitats. *Science*  
749 324, 755-756 (2009)  
750
- 751 Camacho, C., Coulouris, G., Avagyan, V., Ma, N., Papaadopoulos, J., Bealer, K., and Madden, T. L.  
752 BLAST+: architecture and applications. *BMC Bioinformatics* 10, 421 (2009)  
753
- 754 Carver, T. J., Rutherford, K. M., Berriman, M., Rajandream, M.-A., Barrell, B. G., and Parkhill, J. ACT:  
755 the Artemis comparison tool. *Bioinformatics* 21, 3422-3423 (2005)  
756
- 757 Cavallito, C. J., and Bailey, J. H. Allicin, the Antibacterial Principle of *Allium sativum*. I. Isolation,  
758 Physical Properties and Antibacterial Action. *J. Am. Chem. Soc.* 66, 1950-1951 (1944 a)  
759
- 760 Cavallito, C. J., Buck, J. S., and Suter, C. M. Allicin, the Antibacterial Principle of *Allium sativum*. II.  
761 Determination of the Chemical Structure. *J. Am. Chem. Soc.* 66, 1952-1954 (1944 b)  
762
- 763 Conway, T. The Entner-Doudoroff pathway: history, physiology and molecular biology. *FEMS*  
764 *Microbiology Letters* 103, 1-28 (1992)  
765
- 766 Cuppels, D. A. Generation and Characterization of Tn5 Insertion Mutations in *Pseudomonas syringae*  
767 *pv. tomato*. *Applied and environmental microbiology* 51, 323-327 (1986)  
768
- 769 Elmore, M. J., Lamb, A. J., Ritchie, G. Y., Douglas, R. M., Munro, A., Gajewska, A., and Booth, I. R.  
770 Activation potassium efflux from *Escherichia coli* by glutathione metabolites. *Molecular Microbiology*  
771 4, 405-412 (1990)  
772
- 773 Emms, D. M., and Kelly, S. OrthoFinder: solving fundamental biases in whole genome comparisons  
774 dramatically improves orthogroup inference accuracy. *Genome Biology* 16, 157 (2015)  
775
- 776 Epstein, W. The Roles and Regulation of Potassium in Bacteria. Academic Press, Volume 75 (2003)  
777
- 778 Ferguson, G. P., Nikolaev, Y., McLaggan, D., Maclean, M., and Boot, I. R. Survival during exposure to  
779 the electrophilic reagent *N*-ethylmaleimide in *Escherichia coli*: role of KefB and KefC potassium  
780 channels. *J. Bacteriol.* 179, 1007-1012 (1997)  
781
- 782 Ferguson, G. P., Munro, A. W., Douglas, R. M., McLaggan, D., and Booth, I. R. Activation of potassium  
783 channels during metabolite detoxification in *Escherichia coli*. *Molecular Microbiology* 9, 1297-1303  
784 (1993)  
785
- 786 Ferguson, G. P., McLaggan, D., and Booth, I. R. Potassium channel activation by glutathione-S-  
787 conjugates in *Escherichia coli*: protection against methylglyoxal is mediated by cytoplasmic  
788 acidification. *Molecular Microbiology* 17, 1025-1033 (1995)  
789
- 790 Ferguson, G. P., Chacko, A. D., Lee, C. H., Booth, I. R., and Lee, C. The activity of the high-affinity K<sup>+</sup>  
791 uptake system Kdp sensitizes cells of *Escherichia coli* to methylglyoxal. *J. Bacteriol.* 178, 3957-3961  
792 (1996)  
793

- 794 Fitzpatrick, T. B., Amrhein, N., and Macheroux, P. Characterization of YqjM, an Old Yellow Enzyme  
795 Homolog from *Bacillus subtilis* Involved in the Oxidative Stress Response. *Journal of Biological*  
796 *Chemistry* 278, 19891-19897 (2003)  
797
- 798 Gardan, L., Bella, P., Meyer, J.-M., Christen, R., Rott, P., Achouak, W. and Samson, R. *Pseudomonas*  
799 *salomonii* sp. nov., pathogenic on garlic, and *Pseudomonas palleroniana* sp. nov., isolated from rice.  
800 *International Journal of Systematic and Evolutionary Microbiology* 52, 2065-2074 (2002)  
801
- 802 Gruhlke, M. C. H., Portz, D., Stitz, M., Anwar, A., Schneider, T., Jacob, C., Schlaich, N. L., and  
803 Slusarenko, A. J. Allicin disrupts the cell's electrochemical potential and induces apoptosis in yeast.  
804 *Free Radic Biol Med.* 49, 1916-1924 (2010)  
805
- 806 Gruhlke, M. C. H., Schlembach, I., Leontiev, R., Uebachs, A., Gollwitzer, P. U. G., Weiss, A., Delaunay,  
807 A., Toledano, M., and Slusarenko, A. J. Yap1p, the central regulator of the *S. cerevisiae* oxidative stress  
808 response, is activated by allicin, a natural oxidant and defence substance of garlic. *Free Radic Biol Med.*  
809 108, 793-802 (2017)  
810
- 811 Holmgren, A. Antioxidant Function of Thioredoxin and Glutaredoxin Systems. *Antioxidants & Redox*  
812 *Signaling*, 2, 811-820 (2000)  
813
- 814 Horn, T., Betray, W., Slusarenko, A. J., and Gruhlke, M. C. H. *S*-allylmercaptogluthione Is a Substrate  
815 for Glutathione Reductase (E.C. 1.8.1.7) from Yeast (*Saccharomyces cerevisiae*). *Antioxidants* 7, 86  
816 (2018)  
817
- 818 Hsiao, W., Wan, I., Jones, S. J., and Brinkman, F. S. L. IslandPath: aiding detection of genomic islands  
819 in prokaryotes. *Bioinformatics* 19, 418-420 (2003)  
820
- 821 Imai, S., Tsuge, N., Tomotake, M., Nagatome, Y., Sawada, H., Nagata, T., and Kumagai, H. An onion  
822 enzyme that makes the eyes water. *Nature* 419, 685-685 (2002)  
823
- 824 Joardar, V., Lindeberg, M., Jackson, R. W., Selengut, J., Dodoson, R., Brinkac, L. M., Daugherty, S. C.,  
825 DeBoy, R., Durking, A. S., Giglio, M. G., Madupu, R., Nelson, W. C., Rosovitz, M. J., Sullivan, S.,  
826 Crabtree, J., Creasy, T., Davidsen, T., Haft, D. H., Zafar, N., Zhou, L., Halpin, R., Holley, T., Khouri,  
827 H., Feldblyum, T., White, O., Fraser, C. M., Chatterjee, A. K., Cartinhour, S., Schneider, D. J.,  
828 Mansfield, J., Collmer, A., and Buell, C. R. Whole-Genome Sequence Analysis of *Pseudomonas*  
829 *syringae* pv. *phaseolicola* 1448A Reveals Divergence among Pathovars in Genes Involved in Virulence  
830 and Transposition. *J. Bacteriol.* 187, 6488-6498 (2005)  
831
- 832 Kamitani, S., Akiyama, Y., and Ito, K. Identification and characterization of an *Escherichia coli* gene  
833 required for the formation of correctly folded alkaline phosphatase, a periplasmic enzyme. *EMBO J* 11,  
834 57-62 (1992)  
835
- 836 Katho, K., and Standley, D. M. MAFFT Multiple Sequence Alignment Software Version 7:  
837 Improvements in Performance and Usability. *Molecular Biology and Evolution* 30, 772-780 (2013)  
838
- 839 Katzen, F., and Beckwith, J. Transmembrane Electron Transfer by the Membrane Protein DsbD Occurs  
840 via a Disulfide Bond Cascade. *Cell* 103, 769-779 (2000)

- 841
- 842 Kavanagh, K. L., Jörnvall, H., Persson, B., and Oppermann, U. Medium- and short-chain  
843 dehydrogenase/reductase gene and protein families. *Cellular and Molecular Life Sciences* 65, 3895-  
844 3906 (2008)  
845
- 846 Khairnar, N. P., Joe, M.-H., Misra, H. S., Lim, S.-Y., and Kim, D.-H. FrnE: a cadmium inducible protein  
847 in *Deinococcus radiodurans* is characterized as a disulfide isomerase chaperon in vitro and for its role  
848 in oxidative stress tolerance in vivo. *J. Bacteriol.* 195, 2880-2886 (2013)  
849
- 850 Kim, J., Jeon, C. O., and Park, W. Dual regulation of *zwf-1* by both 2-keto-3-deoxy-6-phosphogluconate  
851 and oxidative stress in *Pseudomonas putida*. *Microbiology* 154, 3905-3916 (2008)  
852
- 853 Kloek, A. P., Brooks, D. M., and Kunkel, B. N. A *dsbA* mutant of *Pseudomonas syringae* exhibits  
854 reduced virulence and partial impairment of type III secretion. *Molecular Plant Pathology* 1, 139-150  
855 (2000)  
856
- 857 Koonin, E. V., and Wolf, Y. I. Genomics of bacteria and archaea: the emerging dynamic view of the  
858 prokaryotic world. *Nucleic Acids Research* 36, 6688-6719 (2008)  
859
- 860 Koshkin, A., Nunn, C. M., Djordjevic, S., and Ortiz de Montellano, P. R. The Mechanism of  
861 *Mycobacterium tuberculosis* Alkylhydroperoxidase AhpD as Defined by Mutagenesis, Crystallography,  
862 and Kinetics. *Journal of Biological Chemistry* 278, 29502-29508 (2003)  
863
- 864 Krumsiek, J., Arnold, R., and Rattei, T. Gepard: a rapid and sensitive tool for creating dotplots on  
865 genome scale. *Bioinformatics* 23, 1026-1028 (2007)  
866
- 867 Lamb, C., and Dixon, R. A. The oxidative burst in plant disease Resistance. *Annu. Rev. Plant. Physiol.*  
868 *Plant. Mol. Biol.* 48, 251-275 (1997)  
869
- 870 Langille, M.G. I., Hsiao, W. W. L., and Brinkman, F. S. L. Evaluation of genomic island predictors  
871 using a comparative genomics approach. *BMC Bioinformatics* 9, 329 (2008)  
872
- 873 Lawson, L.D., Hughes, B.G. Characterization of the Formation of Allicin and Other Thiosulfinates from  
874 Garlic. *Planta Medica* 58, 345-350 (1992)  
875
- 876 Lawson, L.D., Wang, Z-Y.J., Hughes, B.G. Identification and HPLC Quantitation of the Sulfides and  
877 Dialk(en)yl Thiosulfinates in Commercial Garlic Products. *Planta Medica* 57, 363-370 (1991)  
878
- 879 Leontiev, R., Hohaus, N., jacob, C., Gruhlke, M. C. H., and Slusarenko, A. J. A Comparison of the  
880 Antibacterial and Antifungal Activities of Thiosulfinate Analogues of Allicin. *Scientific reports* 8, 6763-  
881 6763 (2018)  
882
- 883 Lesniak, J., Barton, W. A., and Nikolov, D. B. Structural and functional features of the *Escherichia coli*  
884 hydroperoxide resistance protein OsmC. *Protein Science* 12, 2838-2843 (2003)  
885

- 886 Levy, A., Salas Gonzales, I., Mittelviehhaus, M., Clingenpeel, S., Herrera Paredes, S., Miao, J., Wang,  
887 K., Devescovi, G., Stillman, K., Monteiro, F., Rangel Alvarez, B., Lundberg, D.S., Lu, T.-Y., Lebeis,  
888 S., Jin, Z., McDonald, M., Klein, A. P., Feltcher, M. E., Rio, T. G., Grant, S. R., Doty, S. L., Ley, R. E.,  
889 Zhao, B., Venturi, V., Pelletier, D. A., Vorholt, J. A., Tringe, S. G., Woyke, T., and Dangl, J. L. Genomic  
890 features of bacterial adaptation to plants. *Nature Genetics* 50, 138-150 (2018)  
891
- 892 Loi, V. V., Huyen, N. T. T., Busche, T., Tung, Q. N., Gruhlke, M. C. H., Kalinowski, J., ernhardt, J.,  
893 Slusarenko, A. J., and Antelmann, H. *Staphylococcus aureus* responds to allicin by global S-  
894 thioallylation – Role of the Brx/BSH/YpdA pathway and the disulfide reductase MerA to overcome  
895 allicin stress. *Free Radical Biology and Medicine* 139, 55-69 (2019)  
896
- 897 Lyngberg, L., Healy, J., Bartlett, W., Miller, S., Conway, S. J., Booth, I. R., and Rasmussen, T. KefF,  
898 regulatory subunit of the potassium efflux system KefC, shows quinone oxidoreductase activity. *J.*  
899 *Bacteriol.* 18, 4925-4932 (2011)  
900
- 901 Maclean, R. San Millan, A. The evolution of antibiotic resistance. *Science* 365, 1082-1083 (2019)  
902
- 903 Meister, A., and Anderson, M. E. Glutathione. *Annu. Rev. Biochem.* 52, 711-760 (1983)  
904
- 905 Mele, G. Visual Blast. *Smart eLab* 8, 14-16 (2016)  
906
- 907 Meury, J., and Kepes, A. Glutathione and the gated potassium channels of *Escherichia coli*. *EMBO J* 1,  
908 339-343 (1982)  
909
- 910 Miller, S., Ness, L. S., Wood, C. M., Fox, B. C., and Booth, I. R. Identification of an Ancillary Protein,  
911 YabF, Required for Activity of the KefC Glutathione-Gated Potassium Efflux System in *Escherichia*  
912 *coli*. *J. Bacteriol.* 182, 6536-6540 (2000)  
913
- 914 Müller, A., Eller, J., Albrecht, F., Prochnow, P., Kuhlmann, K., Bandow, J. E., Slusarenko, A. J., and  
915 Leichert, L. I. O. Allicin Induces Thiol Stress in Bacteria through S-Allylmercapto Modification of  
916 Protein Cysteines. *J Biol Chem.* 291, 11477-11490 (2016)  
917
- 918 Munro, A. W., Ritchie, G. Y., Lamb, A. J., Douglas, R. M., and Booth, I. R. The cloning and DNA  
919 sequence of the gene for the glutathione-regulated potassium-efflux system KefC of *Escherichia coli*.  
920 *Molecular Microbiology* 5, 607-616 (1991)  
921
- 922 Okonechnikov, K., Golosova, O., Fursov, M. and the UGENE team. Unipro UGENE: a unified  
923 bioinformatics toolkit. *Bioinformatics* 28, 1166-1167 (2012)  
924
- 925 Overbeek, R., Olson, R., Pusch, G. D., Olsen, G. J., Davis, J. J., Disz, T., Edwards, R. A., Gerdes, S.,  
926 Parrello, B., Shukla, M., Vonstein, V., Wattam, A. R., Xia, F., and Stevens, R. The SEED and the Rapid  
927 Annotation of microbial genomes using Subsystems Technology (RAST). *Nucleic Acids Research* 42,  
928 D206-D214 (2014)  
929



- 930 Pacific Biosciences. Guidelines for Using a Salt:Chloroform Wash to Clean Up gDNA. PacBio  
931 SampleNet – Shared Protocol (2019). [https://www.pacb.com/wp-content/uploads/2015/09/Shared-](https://www.pacb.com/wp-content/uploads/2015/09/Shared-Protocol-Guidelines-for-Using-a-Salt-Chloroform-Wash-to-Clean-Up-gDNA.pdf)  
932 [Protocol-Guidelines-for-Using-a-Salt-Chloroform-Wash-to-Clean-Up-gDNA.pdf](https://www.pacb.com/wp-content/uploads/2015/09/Shared-Protocol-Guidelines-for-Using-a-Salt-Chloroform-Wash-to-Clean-Up-gDNA.pdf)  
933
- 934 Poole, L. B. The basics of thiols and cysteines in redox biology and chemistry. *Free Radical Biology*  
935 *and Medicine* 80, 148-157 (2015)  
936
- 937 Rabinkov, A., Miron, T., Mirelman, D., Wilchek, M., Glozman, S., Yavin, E., and Weiner, L. S-  
938 Allylmercaptogluthione: the reaction product of allicin with glutathione possesses SH-modifying and  
939 antioxidant properties. *Biochimica et Biophysica Acta (BBA) - Molecular Cell Research* 1499, 144-153  
940 (2000)  
941
- 942 Ramos, J. L., Martínez-Bueno, M., Molina-Henares, A. J., Terán, W., Watanabe, K., Zhang, X.,  
943 Gallegos, M. T., Brennan, R., and Tobes, R. The TetR Family of Transcriptional Repressors. *Microbiol.*  
944 *Mol. Biol. Rev.* 69, 326-356 (2005)  
945
- 946 Reiter, J., Levina, N., van der Linden, M., Gruhlke, M. C. H., Martin, C., and Slusarenko, A. J.  
947 Diallylthiosulfinate (Allicin), a Volatile Antimicrobial from Garlic (*Allium sativum*), Kills Human Lung  
948 Pathogenic Bacteria, Including MDR Strains, as a Vapor. *Molecules* 22, 1711 (2017)  
949
- 950 Rice, P., Lingden, I., and Bleasby, A. EMBOSS: The European Molecular Biology Open Software Suite.  
951 *Trends in Genetics* 16, 276-277 (2000)  
952
- 953 Rocha, E. P. C. DNA repeats lead to the accelerated loss of gene order in bacteria. *Trends in Genetics*  
954 19, 600-603 (2003)  
955
- 956 Sambrook J.F., and Russell, D.W. *Molecular Cloning: A Laboratory Manual*, 3rd ed. ed., Cold Spring  
957 Harbor Laboratory Press, New York, (2001) ISBN-10 0-87969-577-3
- 958 Shouldice, S. R., Heras, B., Walden, P. M., Tosika, M., Schembri, M. A., and Martin, J. K. Structure  
959 and Function of DsbA, a Key Bacterial Oxidative Folding Catalyst. *Antioxidants & Redox Signaling*  
960 14, 1729-1760 (2011)  
961
- 962 Smeets, K., van Damme, E. J., and Peumans, W. J. Isolation and characterization of lectins and lectin-  
963 alliinase complexes from bulbs of garlic (*Allium sativum*) and ramsons (*Allium ursinum*). *Glycoconj J.*  
964 14, 331-343 (1997)  
965
- 966 Soucy, S. M., Huang, J., and Gogarten, J. P. Horizontal gene transfer: building the web of life. *Nature*  
967 *Reviews Genetics* 16, 472-482 (2015)  
968
- 969 Stice, S. P., Stumpf, S. D., Gitatis, R. D., Kvitko, B. H., and Dutta, B. *Pantoea ananatis* Genetic Diversity  
970 Analysis Reveals Limited Genomic Diversity as Well as Accessory Genes Correlated with Onion  
971 Pathogenicity. *Frontiers in Microbiology* 9, 184 (2018)  
972
- 973 Stott, K., Saito, K., Thiele, D. J., and Massey, V. Old Yellow Enzyme. The discovery of multiple  
974 isozymes and a family of related proteins. *Journal of Biological Chemistry* 268, 6097-6106 (1993)  
975

- 976 Trotter, E. W., Collinson, E. J., Dawes, I. W., Grant, C. M. Old Yellow Enzymes Protect against  
977 Acrolein Toxicity in the Yeast *Saccharomyces cerevisiae*. *Appl. Environ. Microbiol.* 72, 4885-4892  
978 (2006)  
979
- 980 van Damme, E. J. M., Smeets, K., Torrekens, S., van Leuven, F., and Peumans, W. J. Isolation and  
981 characterization of alliinase cDNA clones from garlic (*Allium sativum* L.) and related species. *European*  
982 *Journal of Biochemistry* 209, 751-757 (1992)  
983
- 984 Vaz, A. D. N., Chaakraborty, S., and Massey, V. Old yellow enzyme: Aromatization of cyclic enones  
985 and the mechanism of a novel dismutation reaction. *Biochemistry* 34, 4246-4256 (1995)  
986
- 987 Waack, S., Keller, O., Asper, R., Brodag, T., Damm, C., Fricke, W. F., Surovcik, K., Meinicke, P. and  
988 Merkl, R. Score-based prediction of genomic islands in prokaryotic genomes using hidden Markov  
989 models. *BMC Bioinformatics* 7, 142 (2006)  
990
- 991 Whitman, C. P. The 4-oxalocrotonate tautomerase family of enzymes: how nature makes new enzymes  
992 using a  $\beta$ - $\alpha$ - $\beta$  structural motif. *Archives of Biochemistry and Biophysics* 402, 1-13 (2002)  
993
- 994 Whitman, C. P., Aird, B. A., Gillespie, W. R., and Stolovich, N. J. Chemical and enzymic ketonization  
995 of 2-hydroxymuconate, a conjugated enol. *J. Am. Chem. Soc.* 113, 3154-3162 (1991)  
996
- 997 Wills, E. D. Enzyme inhibition by allicin, the active principle of garlic. *Biochem J.*, 63, 514-520 (1956)  
998
- 999 Xin, X.-F., and He, S. Y. *Pseudomonas syringae* pv. *tomato* DC3000: A Model Pathogen for Probing  
1000 Disease Susceptibility and Hormone Signaling in Plants. *Annu. Rev. Phytopathol.* 51, 473-498 (2013)  
1001
